# Supplementary material
Source: ML conference proceedings conference paper supplement (https://openreview.net/forum?id=eK2ZbaaJvd)

I wanted to double-click to start adding fields instead of drag/drop. Especially for the first field when I'm just exploring the data. I wanted to see if there were more countries in this version of Superstore, and dragging was SO MUCH WORK. Ok, not that much, but I still wanted to be able to double-click.

I'd like to be able to scroll the chart area independently of the blocks.

I'd like to be able to create a fresh canvas from the address bar. When I do something that makes the prototype slow to a crawl, I want to restart without having to wait for the UI to finish layout. And when I put the wrong thing on columns (Product Name), the horizontal scrolling meant I couldn't even get to the close box on the block diagram.

Dates are pretty useless as headers when I can't aggregate them. Order Date as a rows value just made a very tall sheet.

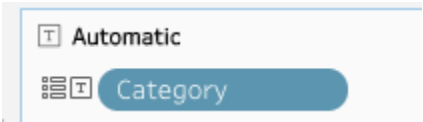

I see the T icon here, but I'm not sure how to make it happen without creating a new block. I managed to end up in a state where Category was on rows, but the text was turned off, so I just had three unlabeled rows. Sometimes choosing Text from the pop-up menu seems to toggle the T, sometimes it changes the encoding. I can't tell what's going on with that.

Is there a way to add labels for bars, like this in Tableau? -

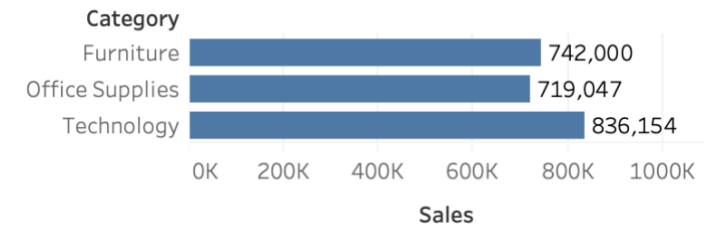

I can figure out how to put them in the next block over to the left, but that's not really what I want.

|                 | Central |  |  |  |  | South |  |  |  |  | West    |  |  |  |  |
|-----------------|---------|--|--|--|--|-------|--|--|--|--|---------|--|--|--|--|
| Furniture       | 8,019   |  |  |  |  | 7,581 |  |  |  |  | 112,191 |  |  |  |  |
| Office Supplies | 6,173   |  |  |  |  | 8,626 |  |  |  |  | 94,650  |  |  |  |  |
| Technology      | 4,977   |  |  |  |  | 7,036 |  |  |  |  | 108,213 |  |  |  |  |

I would like to make a stacked bar graph, but I don't see a way to do it. I only get adjacent bars from this:

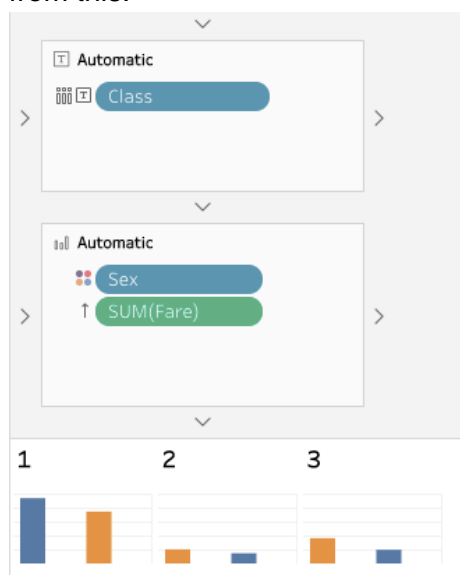

Categorical color encodings are easier to get into overlapped sets, like here where the measure SUM(NumberSurvived) is reusing one of the Sex categories. It would be better if the color encoding on measure names understood what's used in categories elsewhere in the view. Unlike the convenience list above, I think this is important for the long term of the feature.

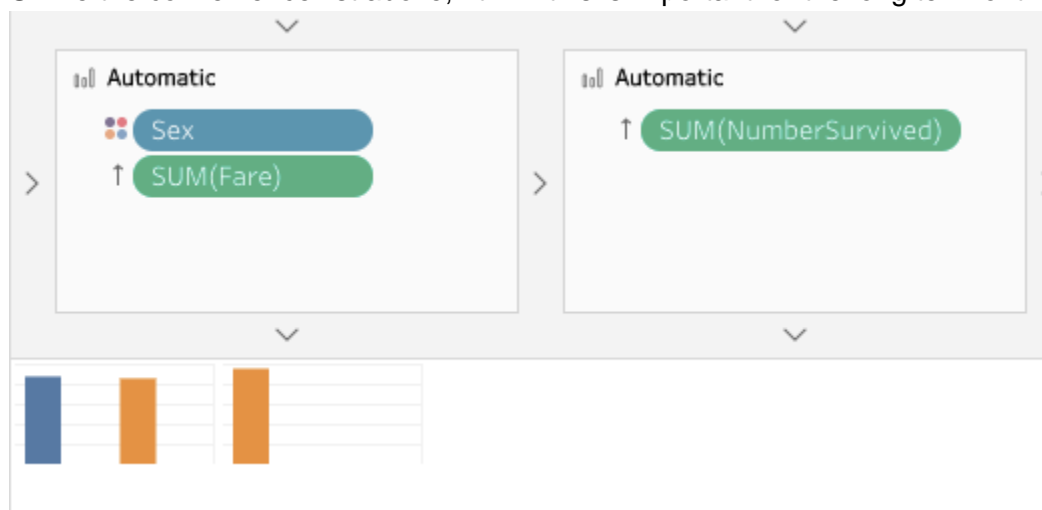

I wonder if we want to adjust the default mark type depending on the encodings in play. For example, when I first dropped a measure onto size to create a block, I got a text mark type by default:

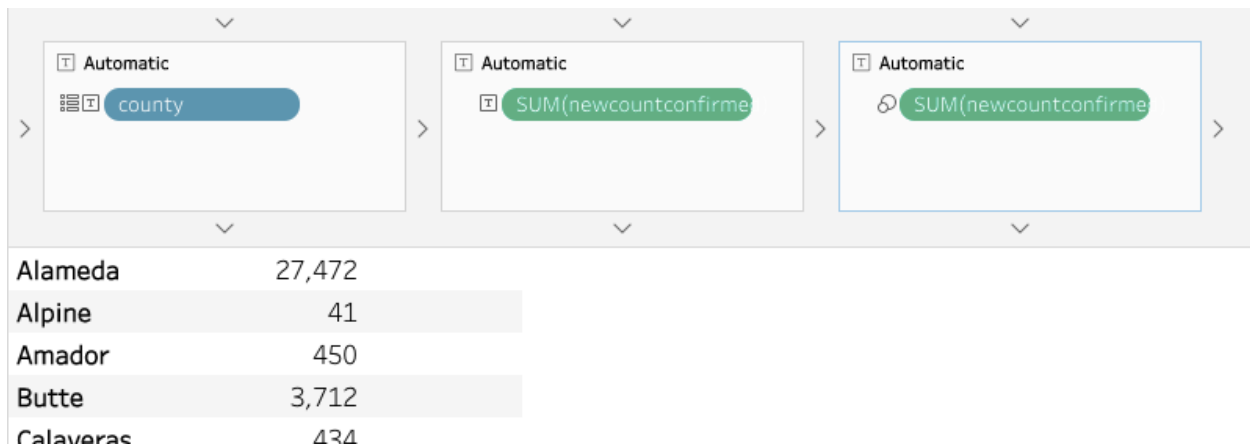

But it would have been nice to pick up Circle or something similar to make the size encoding meaningful:

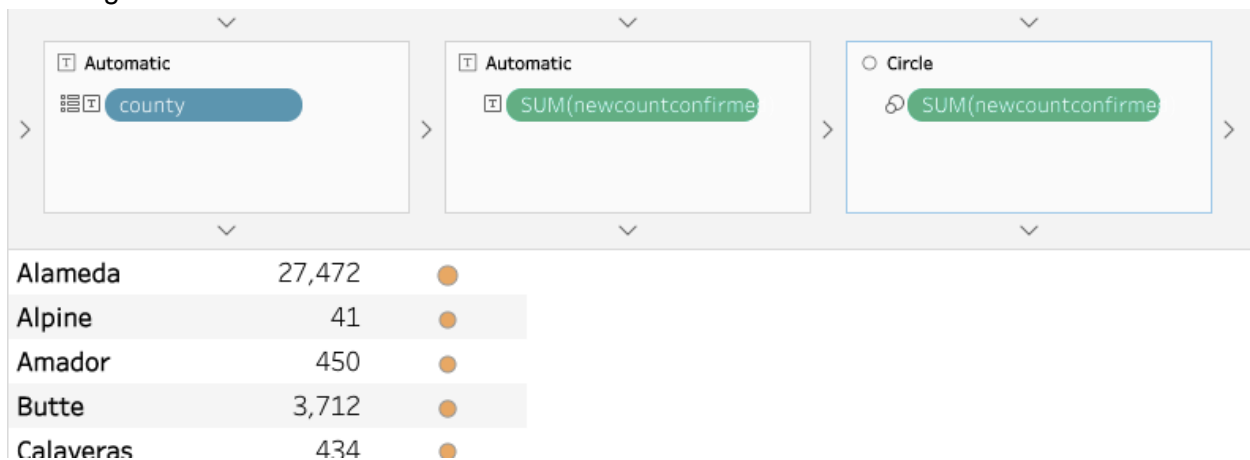

Today's project is to find a way to put multiple LODs in a single row or column. Going to start simple and try to make either a dot plot or a sparkline.

I did generate a sparkline finally. I'm trying to get my head around the new Rows/Columns/Inline and how those controls relate to the layout of the canvas.

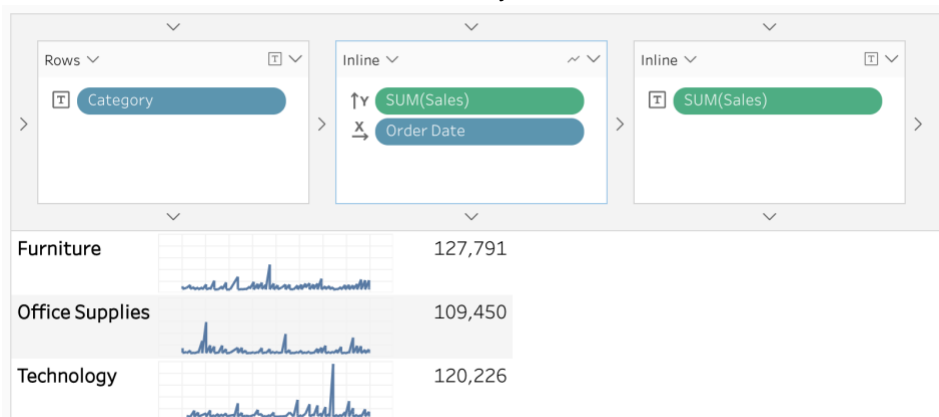

Back at it. I'm going back to the study we did interactively to try to make the text table from the Titanic passengers to see how that works with the rows/columns/inline control.

(Oh yay! I found the button to clear the canvas in the toolbar.)

(Also glad to discover the little X to close a block just now. New?)

First attempt got me this. The Sex block spanning the two blocks to the right makes sense to me when I see what I'm trying to get to because it mirrors the shape of the cells created by these three blocks. But I think I need to get that L shape again to get what I want (with Yes/No in a header row).

The screenshot shows a data visualization tool interface. At the top, there are three panels: 'Rows' containing a 'Sex' block, 'Columns' containing a 'FamilyAboard' block, and 'Inline' containing a 'SUM(NumberSurvived)' block. Below these panels is a table with the following data:

|        | No  | Yes |
|--------|-----|-----|
| female | 218 | 121 |
| male   | 118 | 43  |

OK, yup, that worked. I deleted the big block and dragged Sex to the left of the Inline block, which gave it a rows encoding by default. I notice that I keep building the view with the headers first and the contents second, and I didn't see a way to get the correct view except by adding to the left of the Inline block.

The screenshot shows the same data visualization tool interface, but with the 'Sex' block moved to the left of the 'SUM(NumberSurvived)' block. The table below now has headers for 'No' and 'Yes' in the first row, and the data is organized as follows:

|        | No  | Yes |
|--------|-----|-----|
| female | 218 | 121 |
| male   | 118 | 43  |

Exploring further, just to see what I could get, I turned Sex into a Columns block. That was about what I expected.

I added Number Survived below it as inline, and again got what I expected, although there was a column-wide gap between the blocks now.

When I went to try to add Survived as another category above Sex, I couldn't do that, though. Here you can see Survived mid-drag (I didn't grab the mouse cursor with the screenshot) and there's only an insertion affordance above FamilyAboard and not Sex. Also I can see, as I suspected, that the gap between the columns leaves a space to insert content between them.

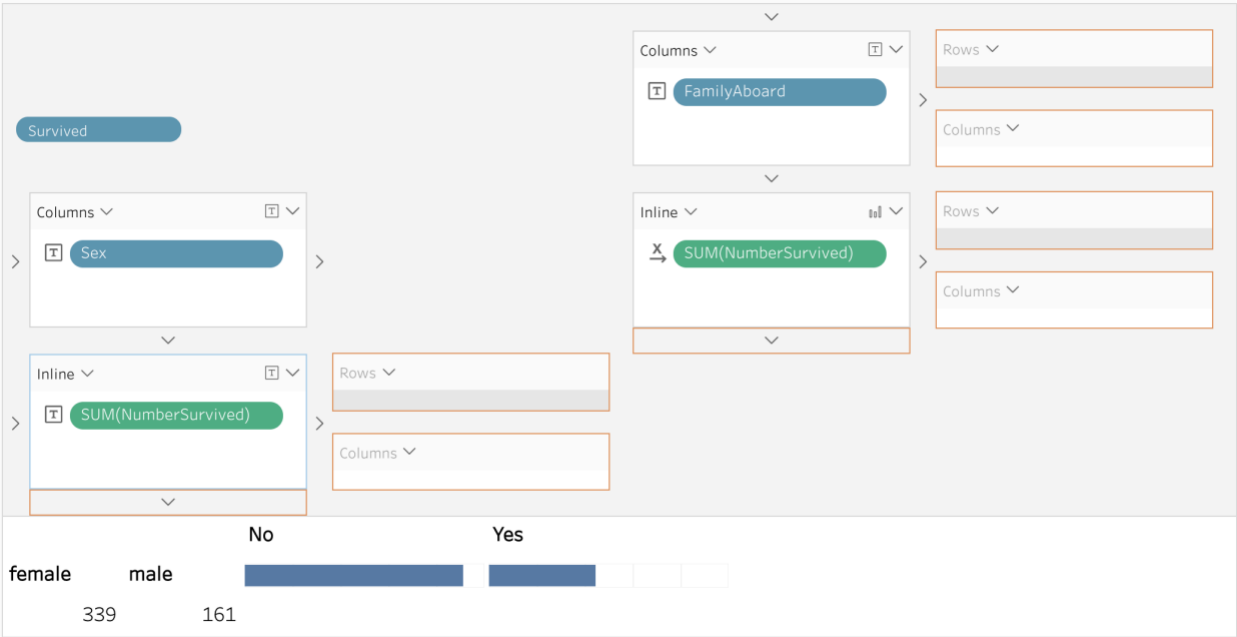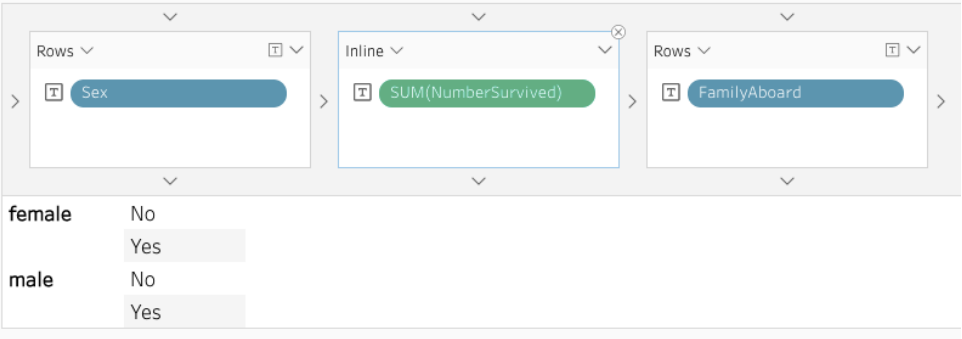

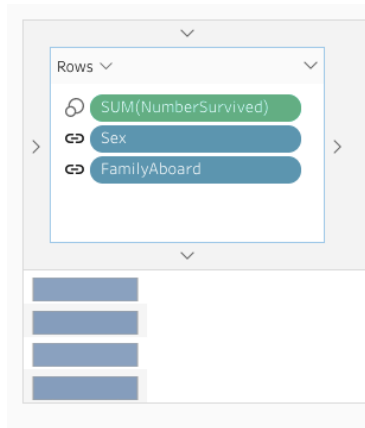

Figuring out how inline, rows, columns, X, and Y all work together has been a real challenge for me. It took me about 10 tries to finally get a line chart, but I'm not sure why I don't get different lines for county when it's on Detail.

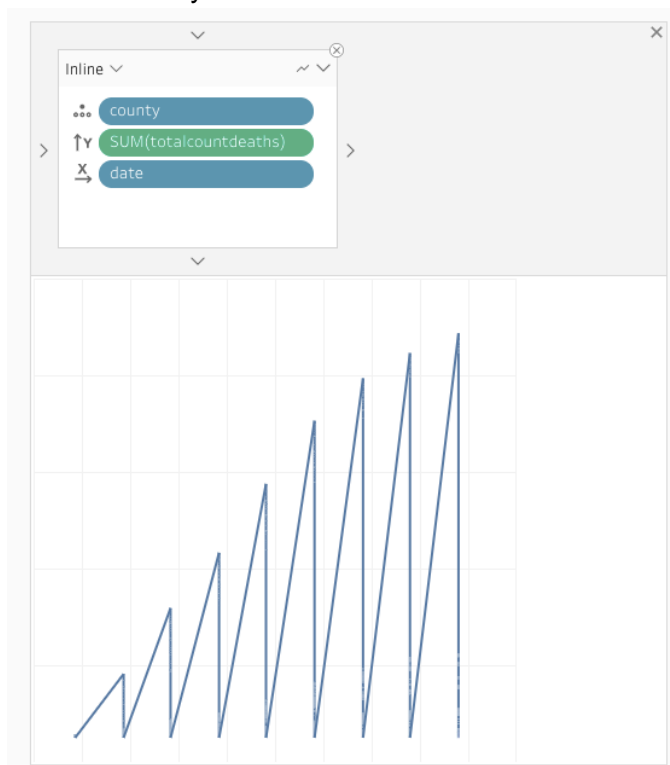

But removing county changes the chart, so it must be doing something:

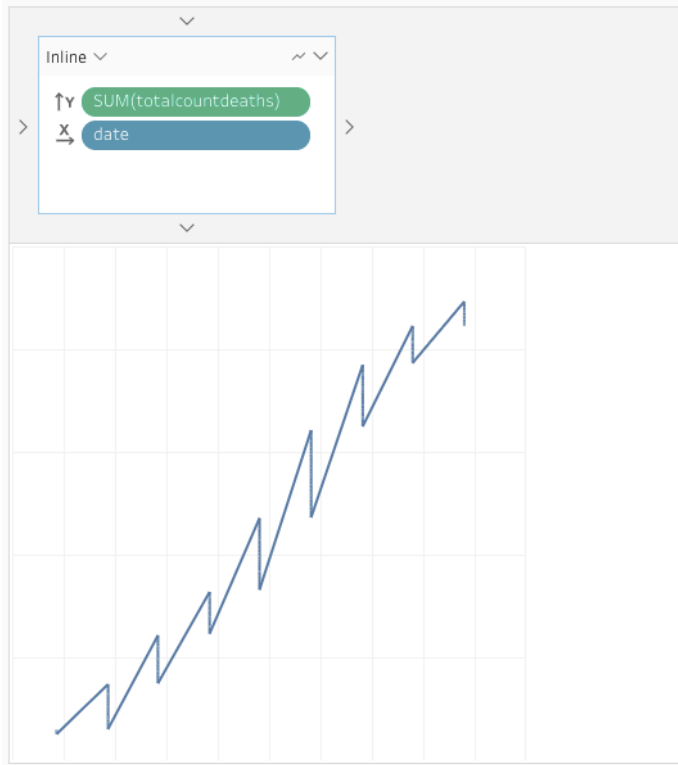

Adding it on color gives me a clue that line graphs split by dimension just might not be working:

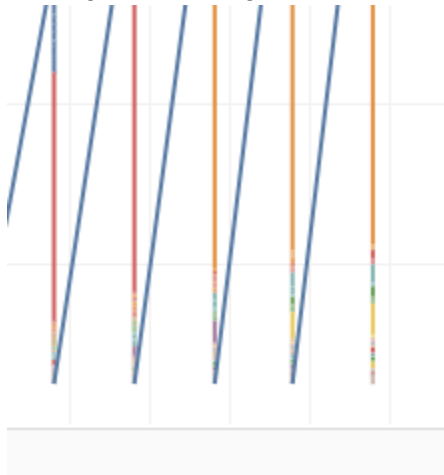

It probably doesn't help that LA's numbers seem so much bigger than everyone else's, at least in this dataset (but are they really that much bigger? Now I'm curious...)

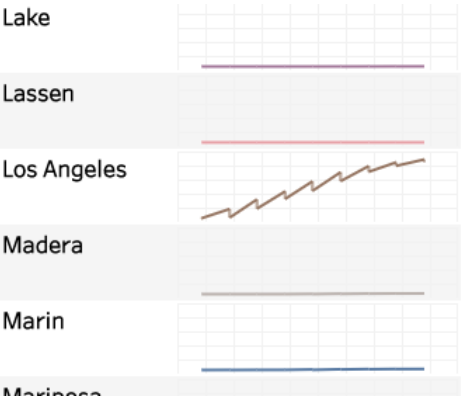

Supplement: supplementary_material [file attachment]
