# Supplementary material
Source: ML conference proceedings conference paper supplement (https://openreview.net/forum?id=eK2ZbaaJvd)

TASK 2A (Gapminder dataset)  
Create a table that shows SUM(GDP) for each  
Region and Country.

Tableau

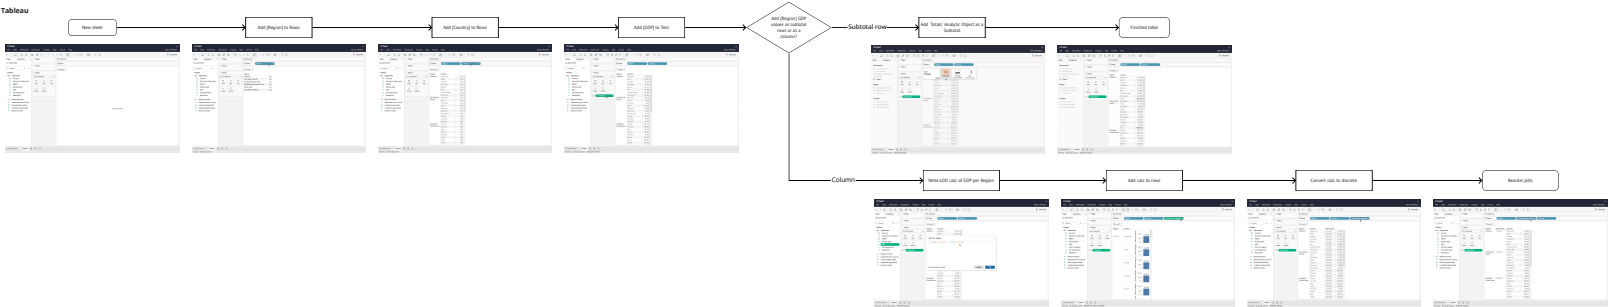

Blocks

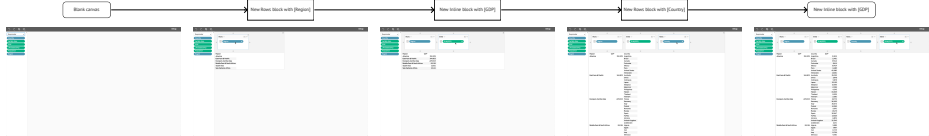

# TASK 2B (Gapminder dataset)

Given the Rich Table from the previous task, sort both Region and Country by SUM(GDP)

## Tableau

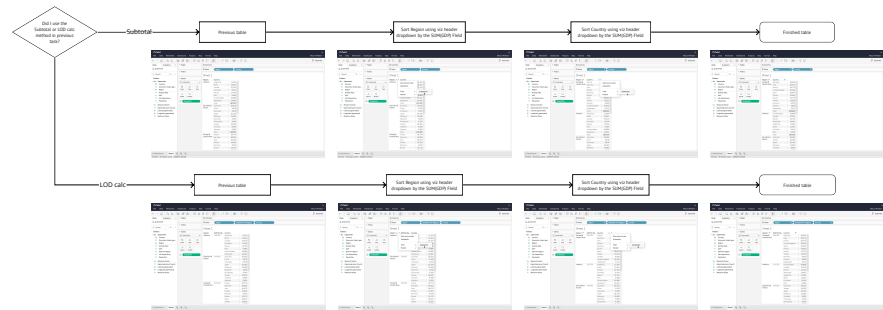

## Blocks

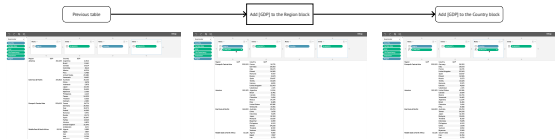

Supplement: supplementary_material [file attachment]
