# Supplementary material
Source: ML conference proceedings conference paper supplement (https://openreview.net/forum?id=eK2ZbaaJvd)
Supplement: supplementary_material [file attachment]

# Experimenter Script

Hi, my name is ________________ and I work on the Blocks project. I’d also like to introduce ______________, who is here to take notes.

Thanks for taking the time to join us today. We are exploring how people use Blocks in their analytical workflows.

I’ll be reading from a script to ensure all participants receive identical instructions.

Today we’re going to ask you to interact with a prototype that allows you to generate a visualization using Blocks and Tableau. We will randomly assign an order of which platform to use first.

Let’s get started. ***Share the tutorial video****.*

***Ask the participant their comfort level using Tableau from a scale of 1 to 5. 1 being least familiar and 5 being an expert.***

***Ask the participant if it’s ok to record the session.***

Now, why don’t you take a moment and get familiar with the Blocks interface. We ask that you use the Superstore dataset.

**Share task slides**

Before you start, here are some additional details:

- Make sure you can access the Tableau Online link and the Blocks prototype that we will provide you over chat.
- You will be using mouse / keyboard interaction so make sure those modalities work for you.
- We will share the task that you need to do and ask you to either start with Tableau or the Blocks first.
- Most importantly, please think aloud as you work:
  - Describe what you are thinking about
  - Especially, describe any time the system does something you didn’t expect
- Also, is it ok if we can record this session? The recording will be useful for us to refer back to when analyzing the study and will not be shared externally.

Do you have any questions?

***Get them to complete the task – until they are done or 5 min before the end of session. Interview them and then thank them for their time.***

# Interview Questions

- Consider how the system responded to the interaction and chart construction.
  - What was the most satisfying aspect of your experience?
  - What would you suggest to improve?
  - Would you find Blocks helpful in your analytical workflow?
    - How? Can you give me an example?
- [if time permitting]
  - Do you have any other feedback on your experience?
  - Do you have any questions for us?

Ask if the participant would be interested in a diary study.

# Guidelines for the experimenter

**During the tasks:**

- **While they are waiting, prompt them to describe what they are expecting**:
  - What do you expect the system to do in response to this question?
  - Focus on the expected viz and the workflow that the participant takes.
- **While they work, prompt them to describe when something unexpected happens**. E.g.
  - Did that do what you expected? Why/Why not?
  - What did you expect to happen there?
- Ask questions in an open-ended, non-leading way. (What did you expect…? Not: Did you expect it to ___?)
- Quiet people will need more prompting
- If they are stuck you can suggest a tip to help them move forward.

#

# 
