# Supplementary material
Source: ML conference proceedings conference paper supplement (https://openreview.net/forum?id=eK2ZbaaJvd)
Supplement: supplementary_material [file attachment]

Attempted to draw a bar chart at the bottom by placing the dimension on Columns, X, until I used Detail and got what I wanted.

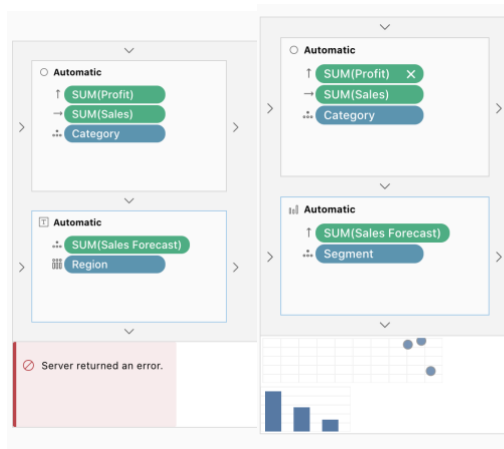

In general, surprised that the header values are replaced when I drop a measure on Text. I find it very hard to create a table in the block. Ah, but I remember that maybe I need to use a separate block for that

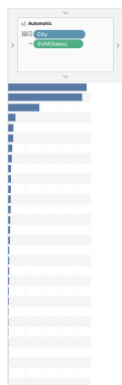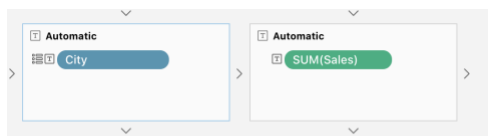

|                          |       |
|--------------------------|-------|
| <b>Arlington Heights</b> | 14    |
| <b>Aurora</b>            | 7,573 |
| <b>Avondale</b>          | 947   |
| <b>Bellingham</b>        | 3,790 |
| <b>Bloomington</b>       | 1,568 |
| <b>Bolingbrook</b>       | 218   |
| <b>Bullhead City</b>     | 22    |
| <b>Chandler</b>          | 1,077 |
| <b>Cheyenne</b>          | 1,603 |
| <b>Columbia</b>          | 6,168 |
| <b>Columbus</b>          | 7,960 |
| <b>Conway</b>            | 302   |
| <b>Elkhart</b>           | 171   |
| <b>Fayetteville</b>      | 3,743 |
| <b>Florence</b>          | 3,062 |

I can very easily reason about rich tables in blocks. It makes a lot of sense, as I'm thinking about the intended layout and not the hacks in mind that I need to do in tableau to get things lined up correctly.

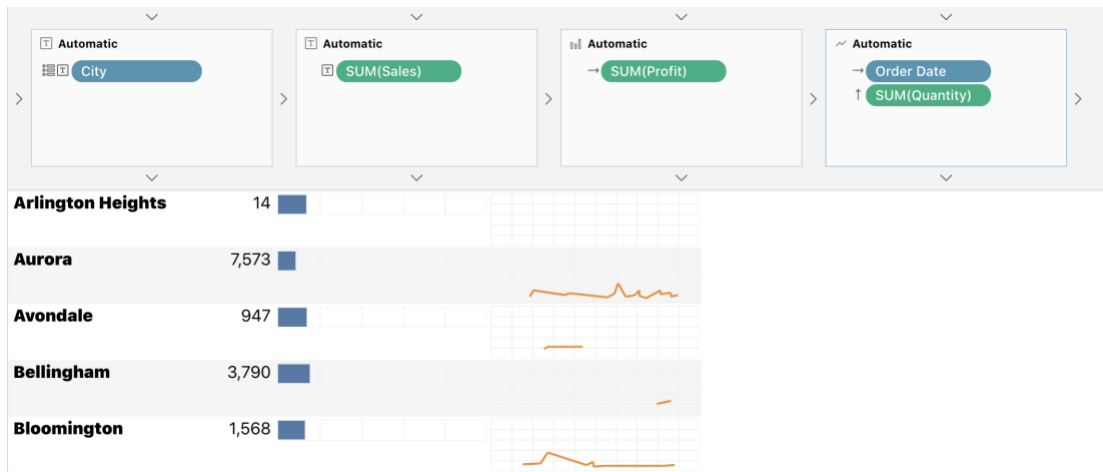

Here I would have expected the sparklines to be one per Category not one per Subcategory.

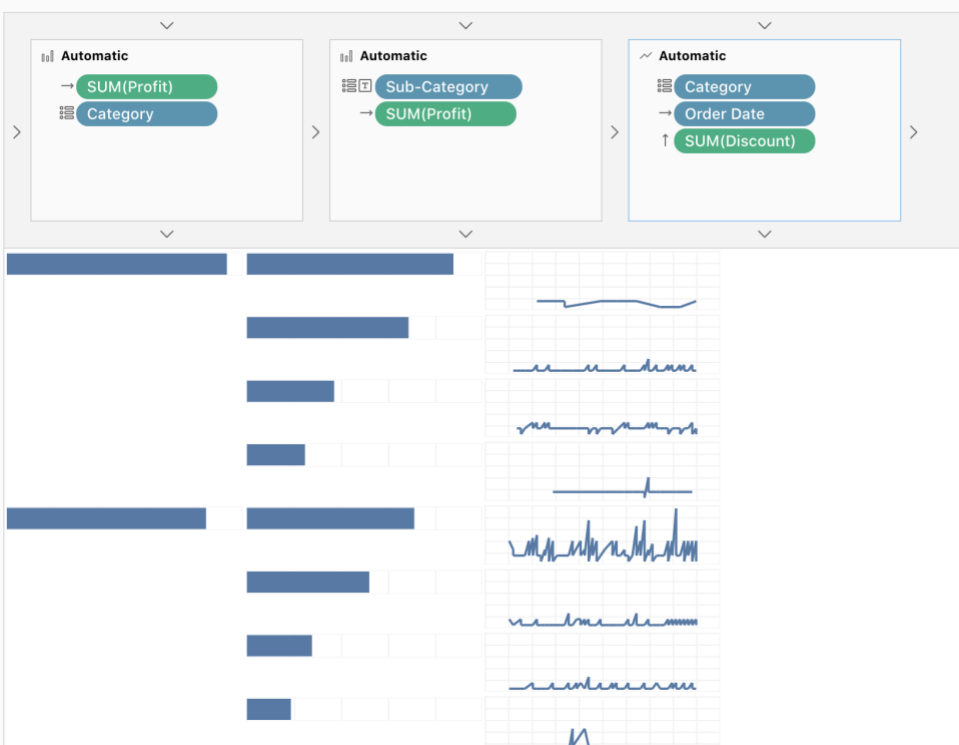

I'm trying to build a small multiples chart by first trying to figure out how to build a text table first. Things are looking a bit weird...

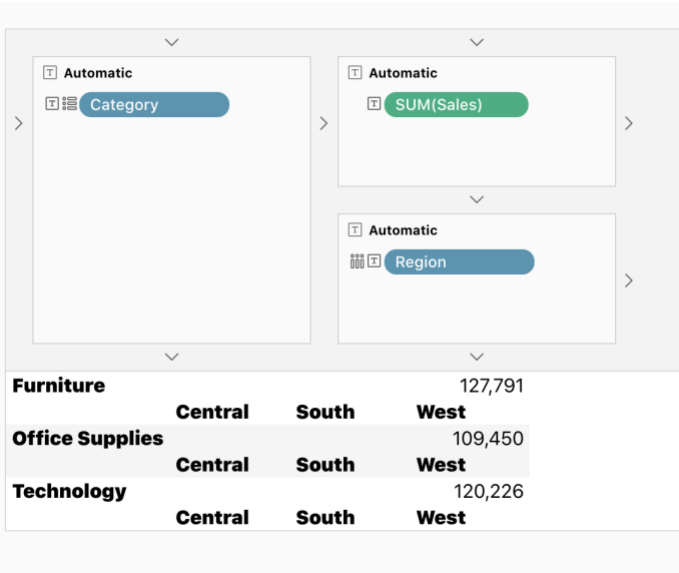

But now I see what the problem is... I first want to build my layout easily and then populate the encodings. Below I get what I expect. And now it's super easy to actually build the small multiples.

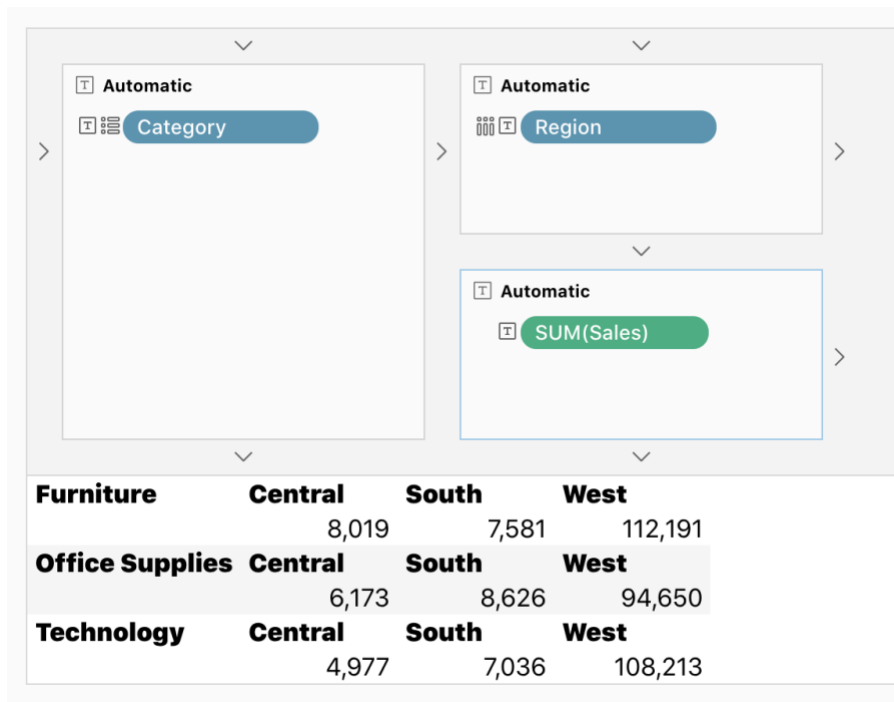

The small multiples version of this text table is presented below

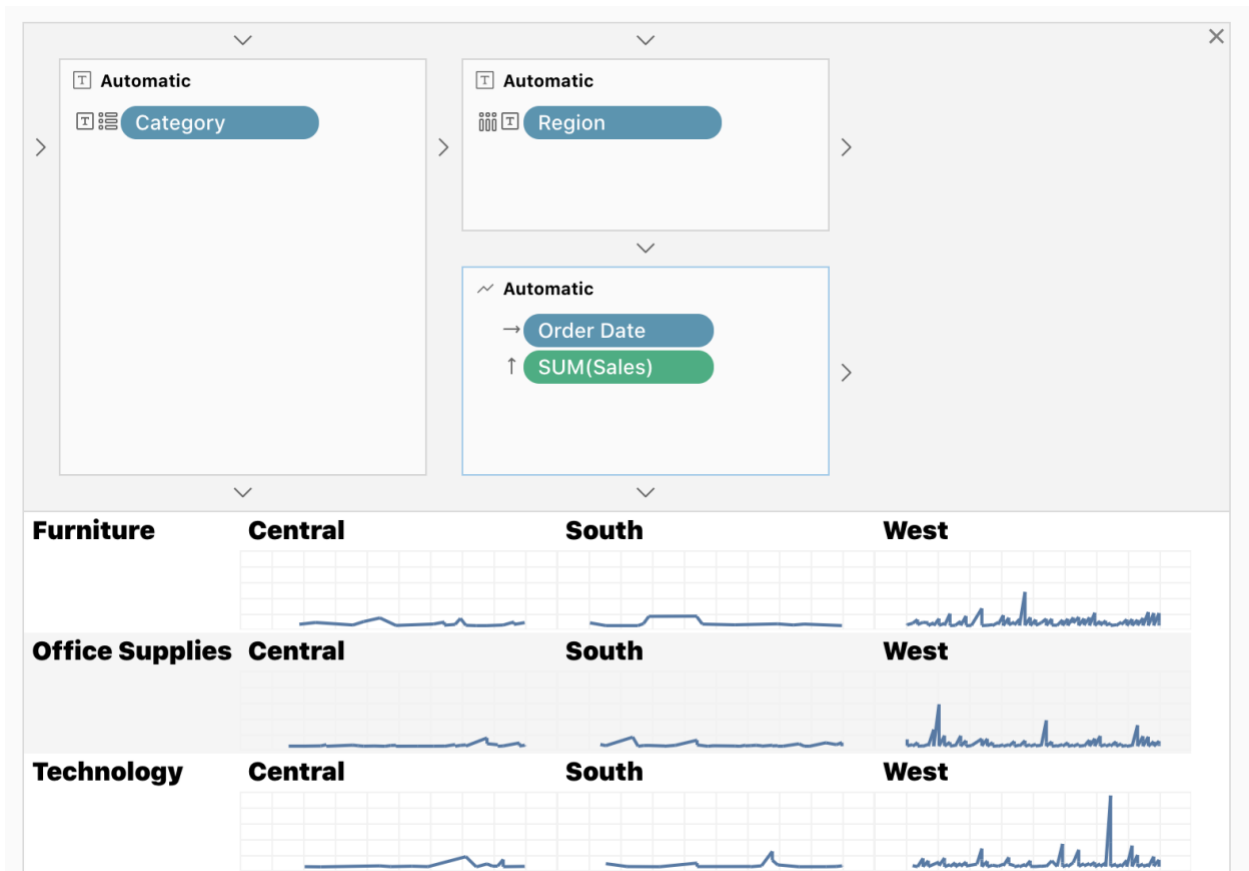

Now I want to add more measures in this small multiples (which is super hard when you want to do this with >2 measures in Tableau. With blocks I can easily add as many as I want within the partition I'm interested in. Here I would like to color by measure names but clearly that is not possible in the prototype.

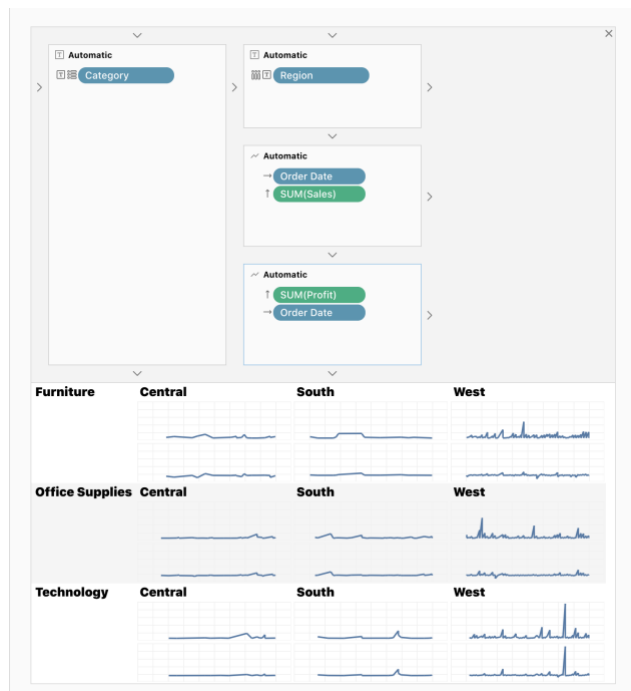

Ohhh nice way to expand each cell (which I could place two measures on each block's "→" dropzone).

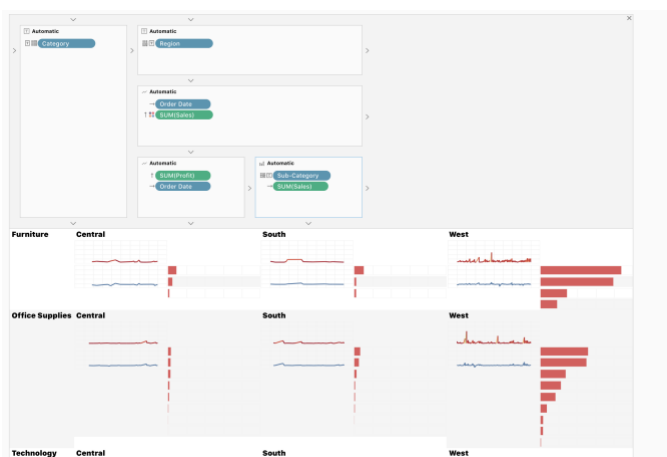

Wish List:

- Rearrange blocks to easily restructure my view
- Write calcs
- Two different continuous pills on "→" so I can do multi-pane in one block.
- It would be nice to have labels next to each axis. Right now I have to check up on the blocks I have setup to remind myself of what I created.

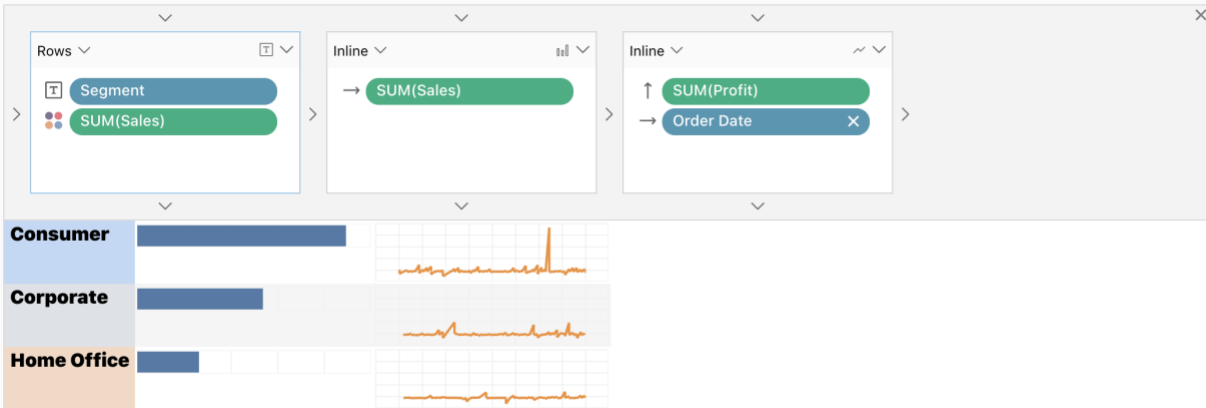

I'm confused.. I'm trying to place a dimension on Rows for the bar chart but I only see Rows/Column drop zones appear at the end of the workflow.

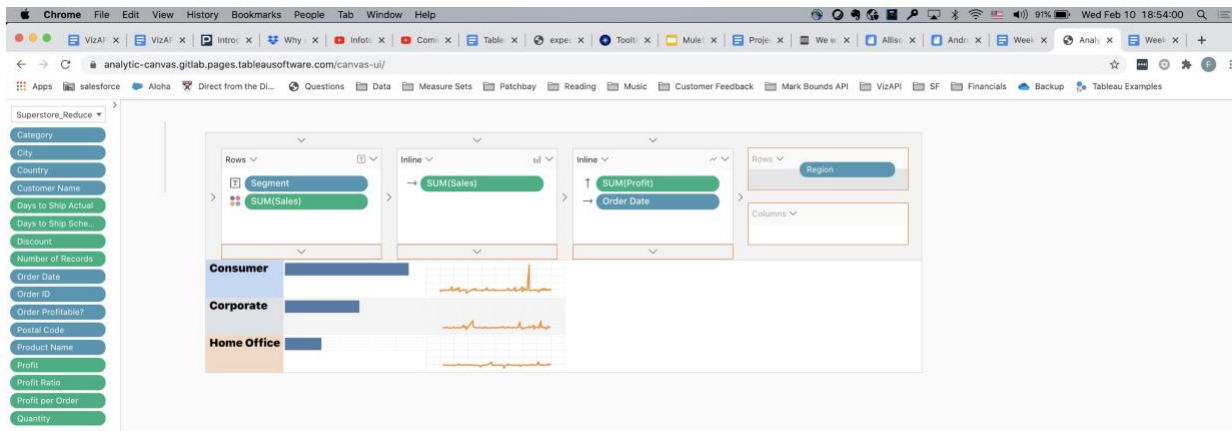

Ah found it! I had to toggle based on the dropdown on the top of the block

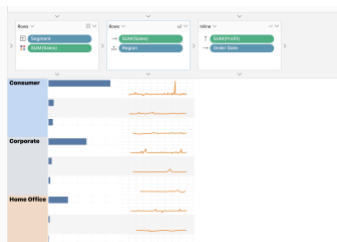

I like how you can create rich tables and encode the dimension values based on continuous ones.

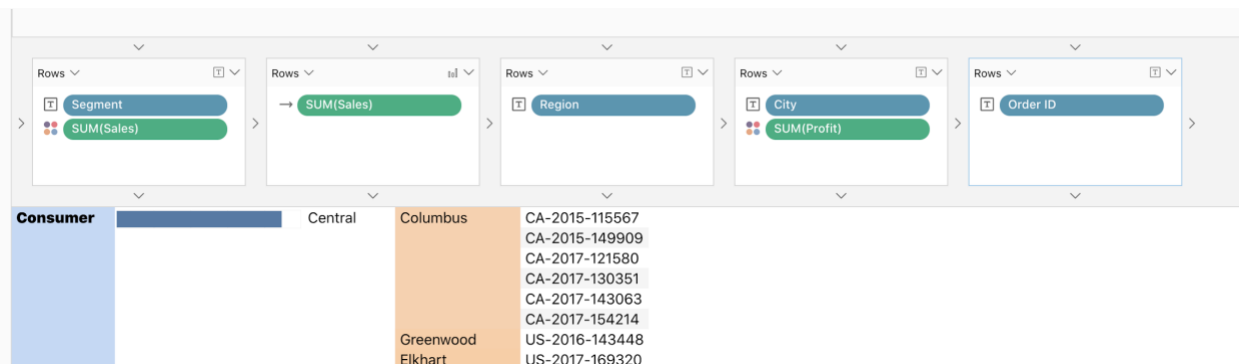

I decided to try and build this \*dashboard\* using blocks.

### Austin Animal Center Intakes & Outcomes, 2014 - 2021

Select a year to filter the data

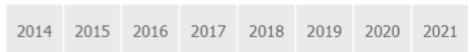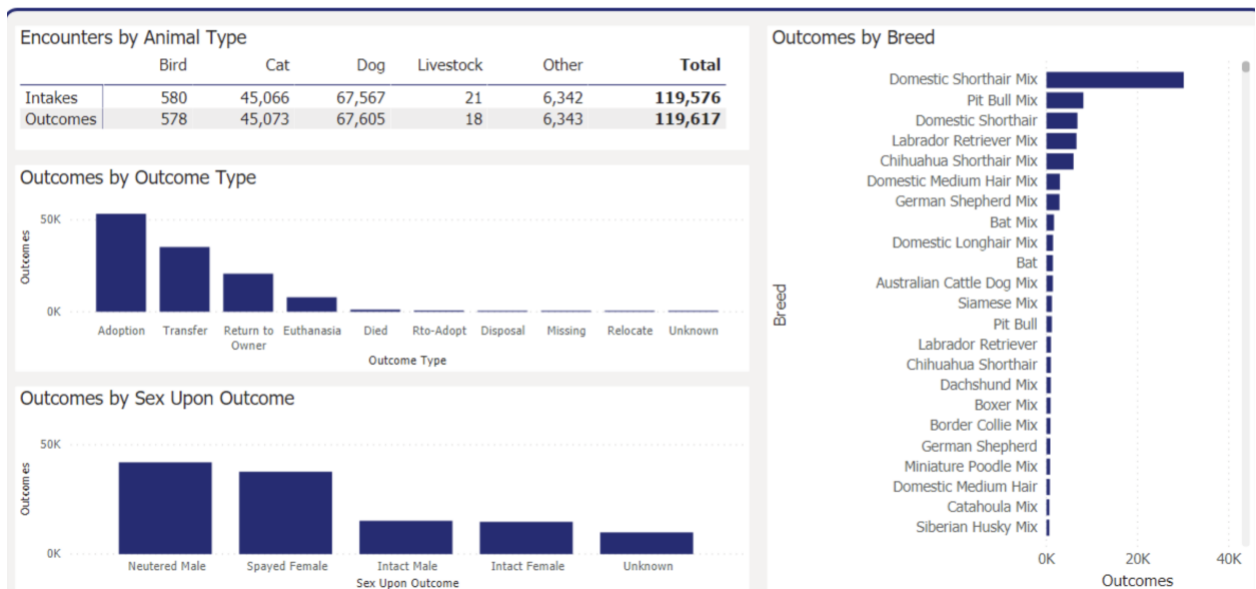

- I started by easily arranging the text table on top which was easy to setup.
- Then I decided to build the bar chart below the text table so I dragged the dimension below and then the sales below that.
- I realized that I probably needed to do the last two steps in reverse to get the layout of the labels the way I want them, i.e. header values at the bottom and bars above.

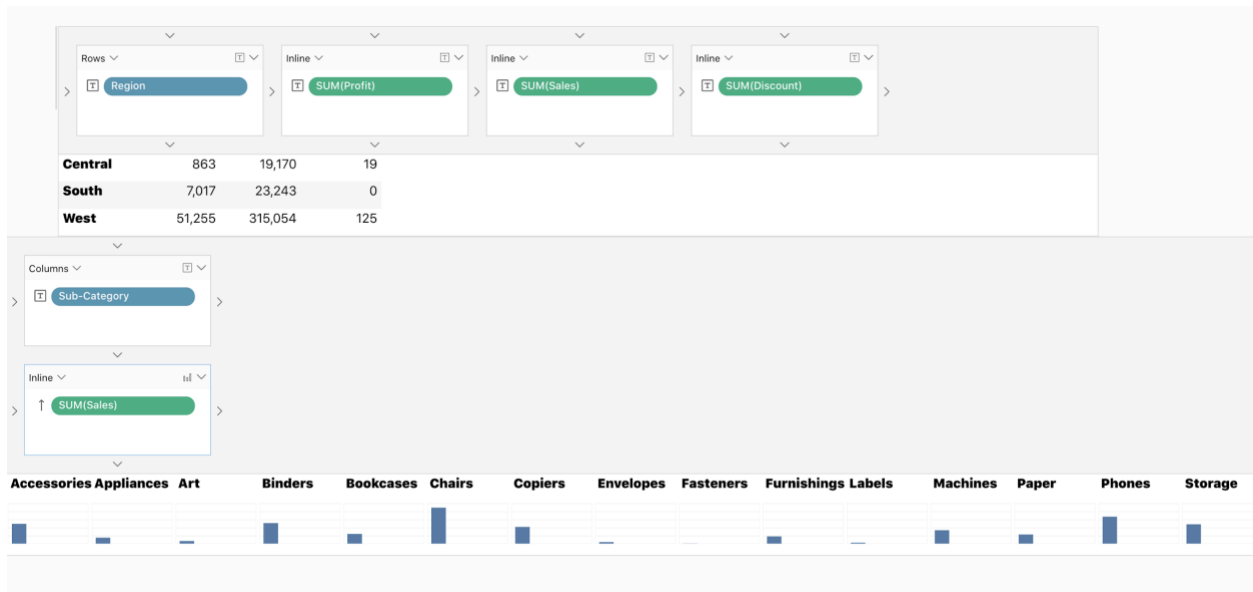

- I wish it was easier to flip the two blocks to get the layout I want. Instead, I have to remove the bottom two blocks and do it again.
- But turns out that when I do that I don't quite get what I expected...

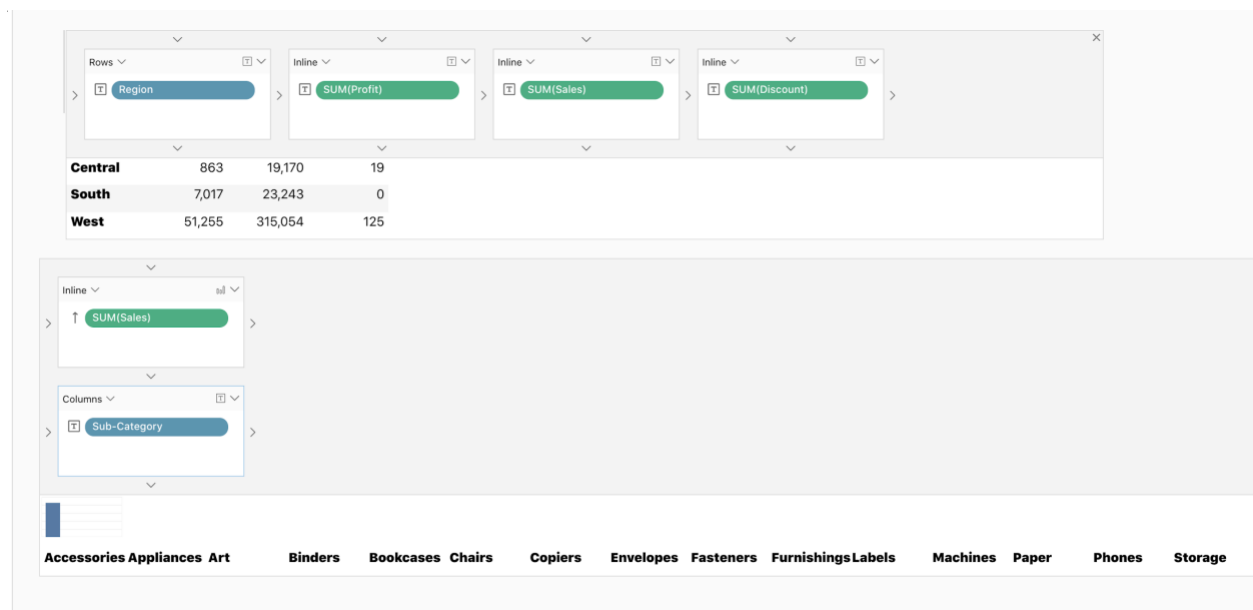

- I'm not quite sure what the dropzone is indicating when I drag a new pill in a new container. My assumption is that it doesn't matter.

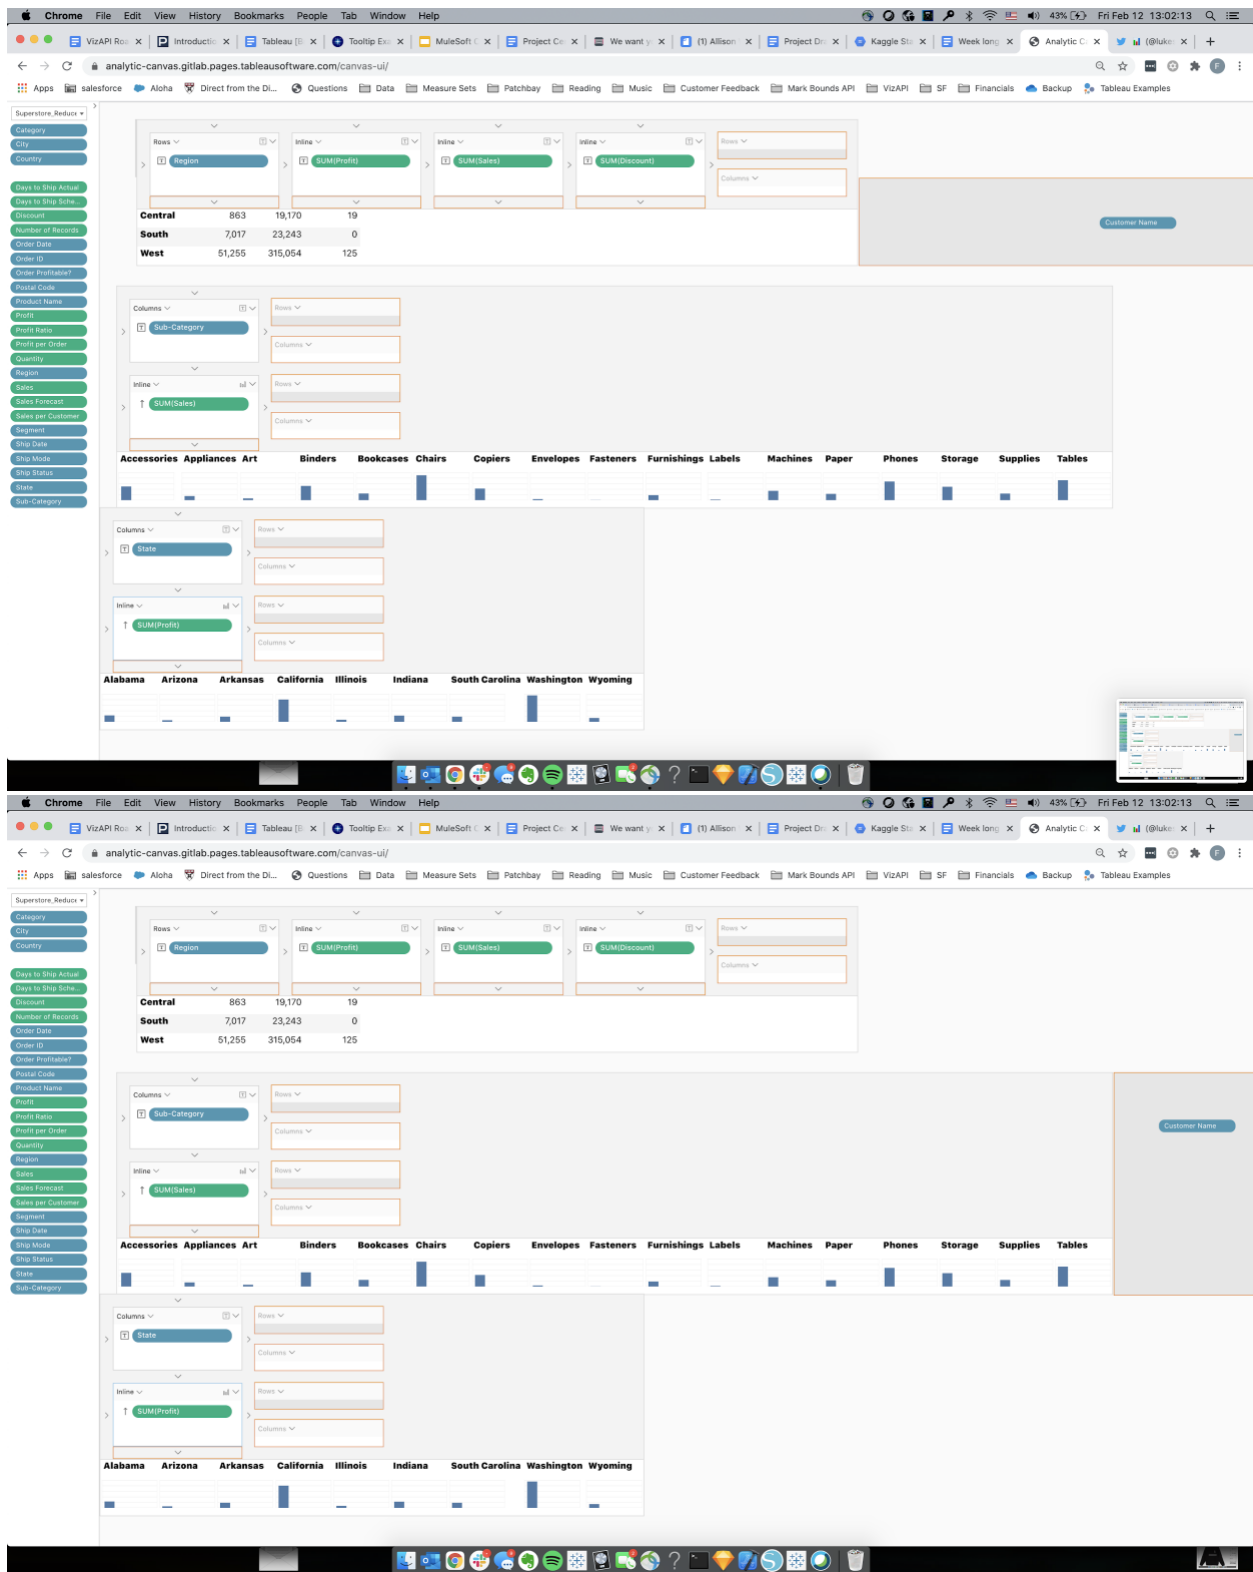

Below is the final output which is the dashboard that I originally started with.

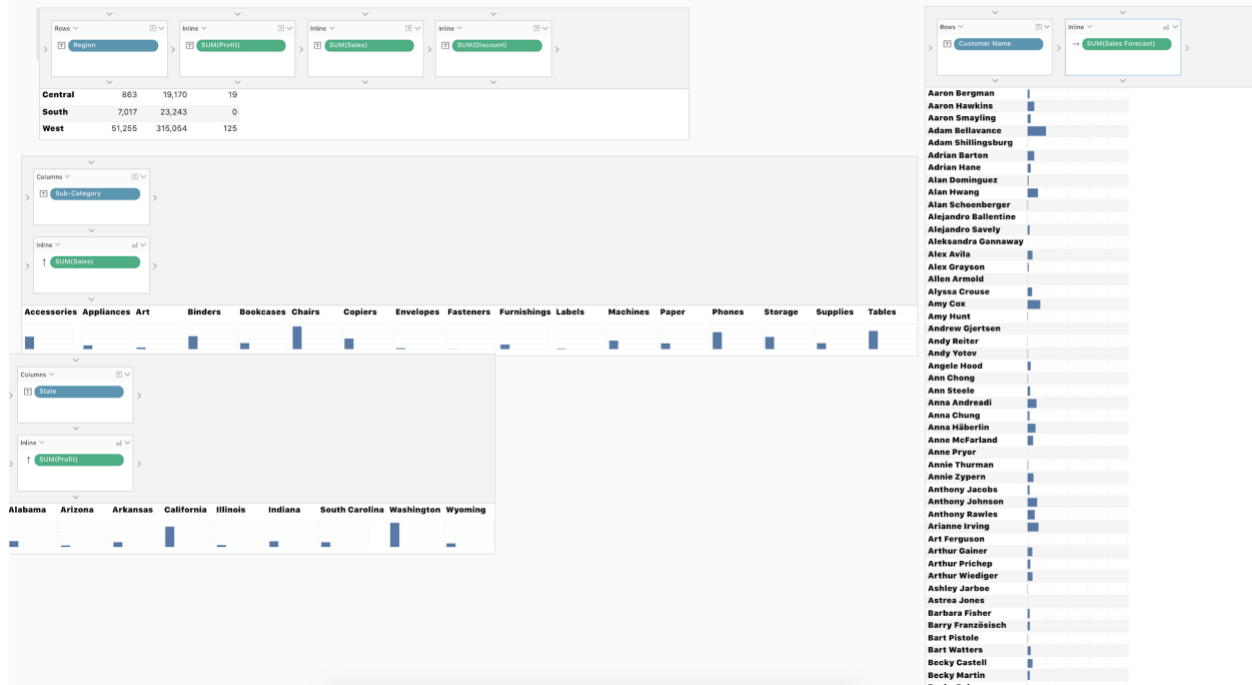

- The dashboard below is presented as a challenge in WoW on Twitter by Zen Masters. Let's see how easy it is to do it with Blocks. Notes:
  - I can't aggregate time in Years it seems
  - No headers showing
  - Couldn't find a way to create custom shapes. Also confused that Order Profitable results in orange/light orange instead of blue and orange. Expected?
  - Can't write calcs
  - Formatting individual columns that are either discrete or continuous is super simple. In Tableau I have to think hard about this.

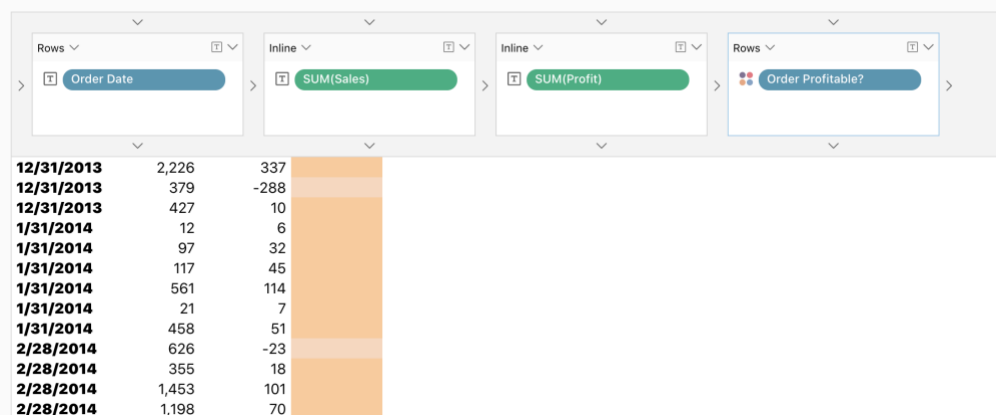

|           | CY SALES  | LY SALES | CY vs LY | Δ         | % DIFF  | BEST DAY   | WORST DAY  | RANK   |
|-----------|-----------|----------|----------|-----------|---------|------------|------------|--------|
| January   | \$43,971  | \$18,542 | ✓        | +\$25,429 | +137.1% | 01/16/2020 | 01/06/2020 | BOTTOM |
| February  | \$20,301  | \$22,979 | ✗        | -\$2,678  | -11.7%  | 02/17/2020 | 02/28/2020 | BOTTOM |
| March     | \$58,872  | \$51,716 | ✓        | +\$7,156  | +13.8%  | 03/23/2020 | 03/14/2020 | TOP    |
| April     | \$36,522  | \$38,750 | ✗        | -\$2,229  | -5.8%   | 04/06/2020 | 04/03/2020 | BOTTOM |
| May       | \$44,261  | \$56,988 | ✗        | -\$12,727 | -22.3%  | 05/19/2020 | 05/05/2020 | BOTTOM |
| June      | \$52,982  | \$40,345 | ✓        | +\$12,637 | +31.3%  | 06/01/2020 | 06/06/2020 | BOTTOM |
| July      | \$45,264  | \$39,262 | ✓        | +\$6,002  | +15.3%  | 07/03/2020 | 07/12/2020 | BOTTOM |
| August    | \$63,121  | \$31,115 | ✓        | +\$32,006 | +102.9% | 08/17/2020 | 08/04/2020 | TOP    |
| September | \$87,867  | \$73,410 | ✓        | +\$14,457 | +19.7%  | 09/02/2020 | 09/13/2020 | TOP    |
| October   | \$77,777  | \$59,688 | ✓        | +\$18,089 | +30.3%  | 10/22/2020 | 10/04/2020 | TOP    |
| November  | \$118,448 | \$79,412 | ✓        | +\$39,036 | +49.2%  | 11/17/2020 | 11/22/2020 | TOP    |
| December  | \$83,829  | \$96,999 | ✗        | -\$13,170 | -13.6%  | 12/02/2020 | 12/06/2020 | TOP    |

#WORKOUTWEDNESDAY2021 WEEK 6 | BY: @ANNIJACKSON

When I start with something like this, and then I drag a dimension on the first block, I'm looking for the Rows shelf...

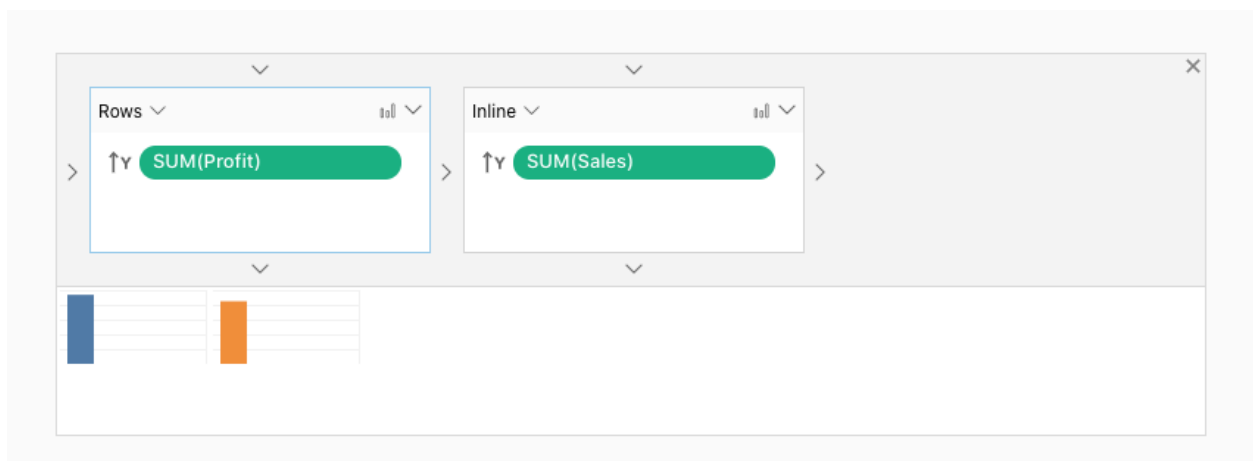

I drop it on X axis because I don't see the rows shelf

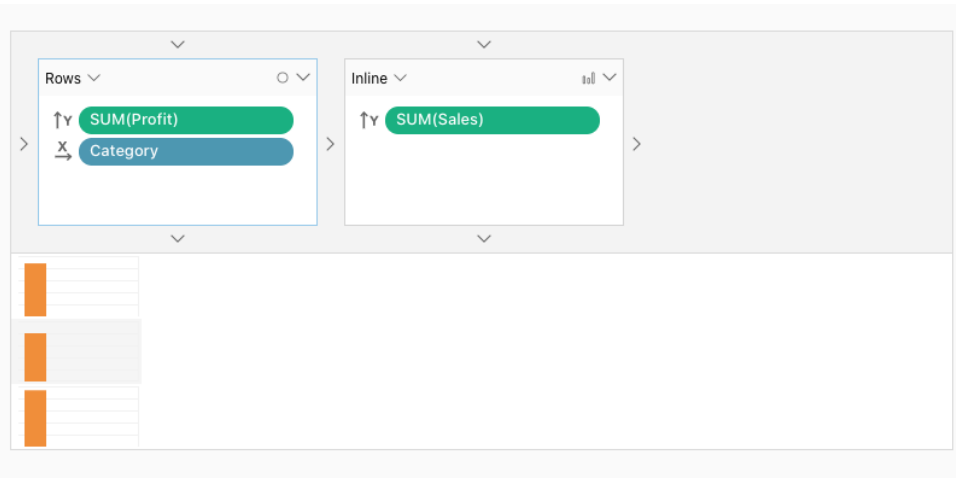

Then I realize that I should probably drop it on detail to get it for both blocks. Not sure I understand why that is the case...

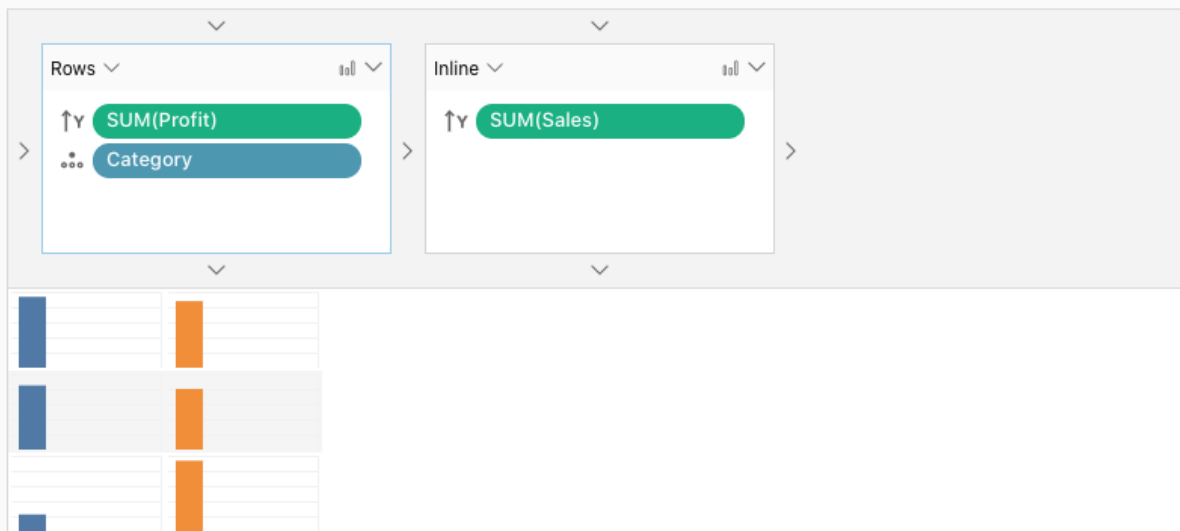

Today I'm mostly dropping stuff in random places and seeing if I can make sense out of it. In Tableau I find this quite easy because I have a good understanding of what each pill in what position results in what operation. In Blocks it's much harder for me to reason about what this layout means...

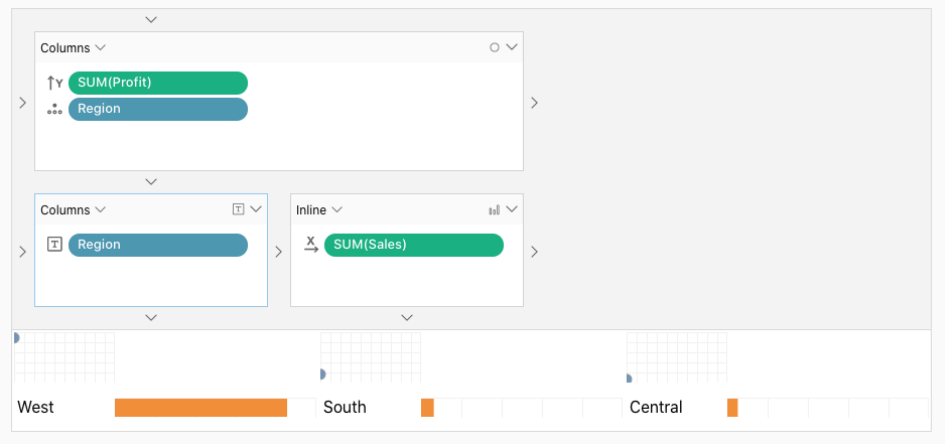

I'm trying to follow the nested dependency between each block but then also trying to remember to check what is on the top left of each block and what on the top right as well. It feels like I'm juggling a lot of things and simultaneously trying to comprehend the new layout. This is not bad necessarily, just new and difficult for me when I'm leaving the design of a rich table, which I know what I need to do much easier. I guess this gets to another interesting realization: once blocks start to become multidimensional (I define this as the layout above where I have nested relationships to the right and to the bottom) it's hard to know what to expect to be drawn. On the other hand, when the blocks are linear (one after the other) the relationships are much easier to make sense of and the results are expected. I find myself dragging a pill in the view and struggling to let it go because I'm not sure what to expect when I let go.

Attempt to build a small multiple:

- Starting with the dimensions is easy.

| Rows                   |                | Columns      |             |
|------------------------|----------------|--------------|-------------|
| Category               |                | Region       |             |
| <b>Furniture</b>       | <b>Central</b> | <b>South</b> | <b>West</b> |
| <b>Office Supplies</b> | <b>Central</b> | <b>South</b> | <b>West</b> |
| <b>Technology</b>      | <b>Central</b> | <b>South</b> | <b>West</b> |

Then my first instinct is to bring the measure on X or Y under the Category block not the Region block, which is wrong as I realize. Also the bug that pushes the Region block is not helping, as I'm confused more with what is happening.

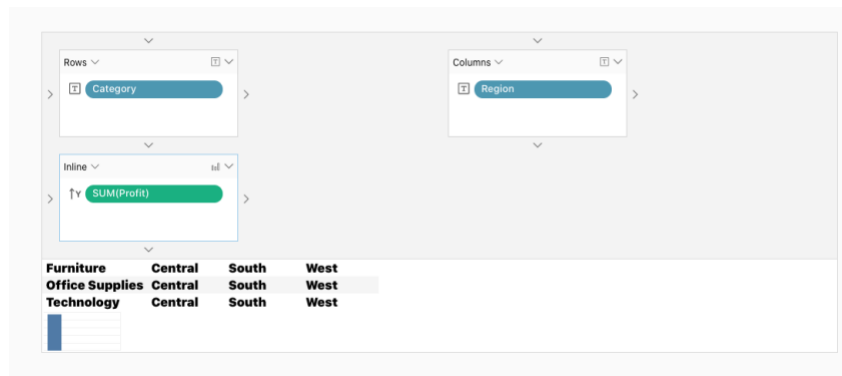

Now I realize that the Profit block needs to be nested within the Category and Region blocks, so I fix that and it feels good! (I wish I could easily re-arrange blocks in the layout)

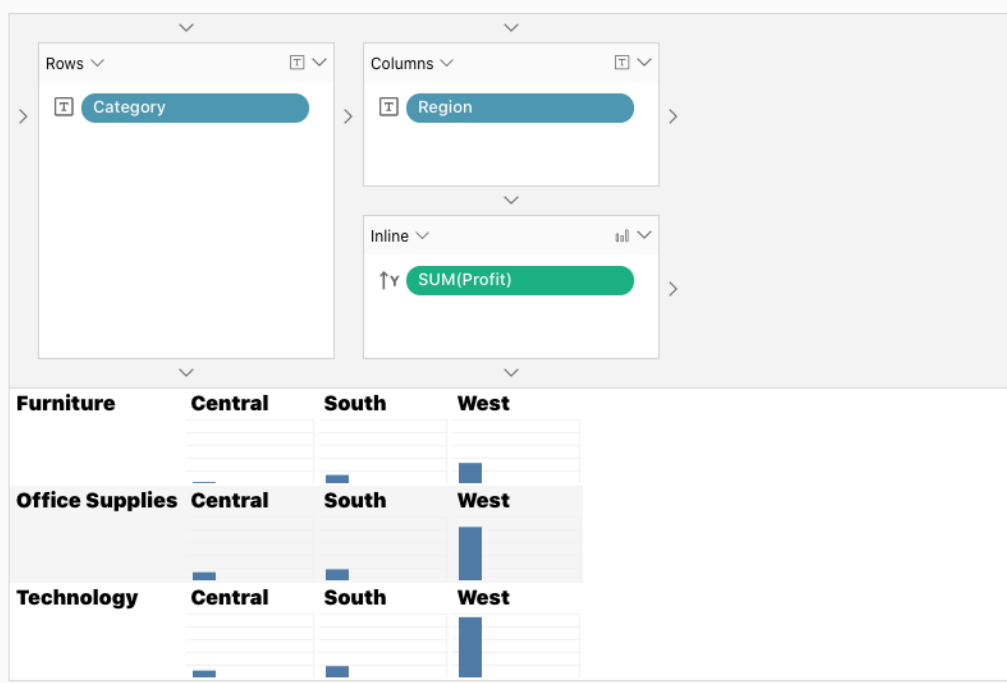

Now it's time to bring the other measure in the view. I drop it accidentally next to the Profit block and that results in something I don't want.

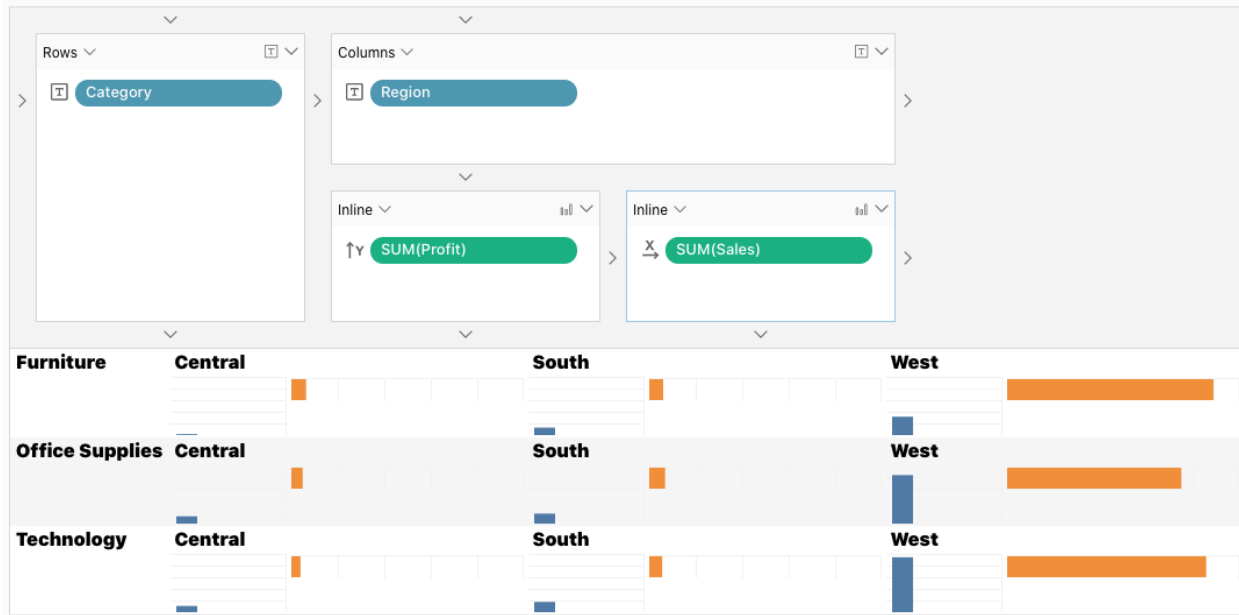

- In retrospect I see that it's obvious I should drag it in the Profit block but I still struggle to decipher the layout resulted from my mistake above.

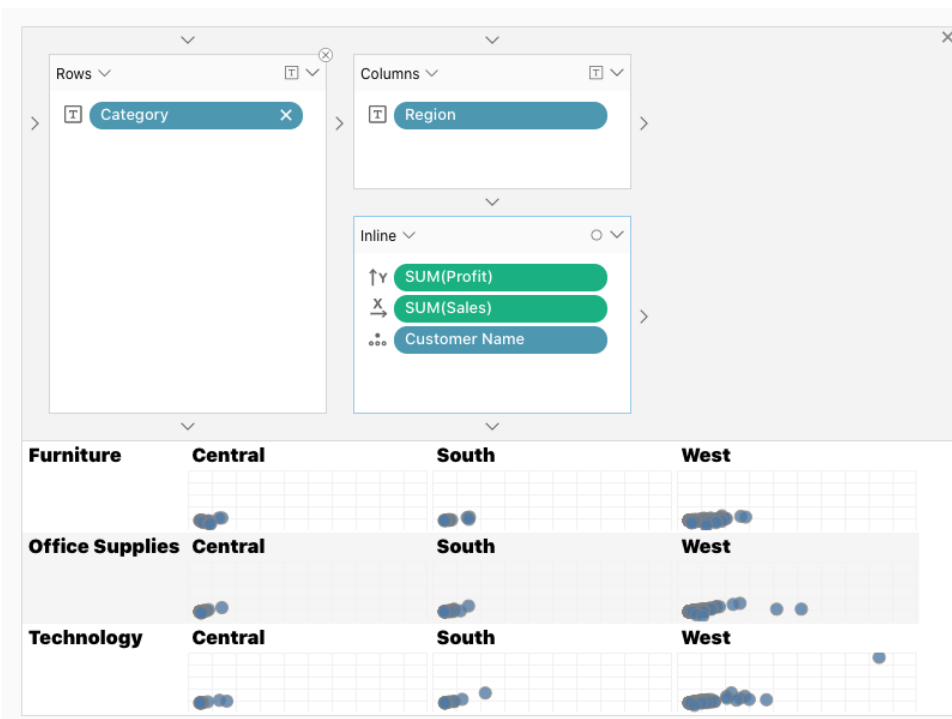

- Continue to have a little fun... I want to break down Profit below based on Ship Mode.

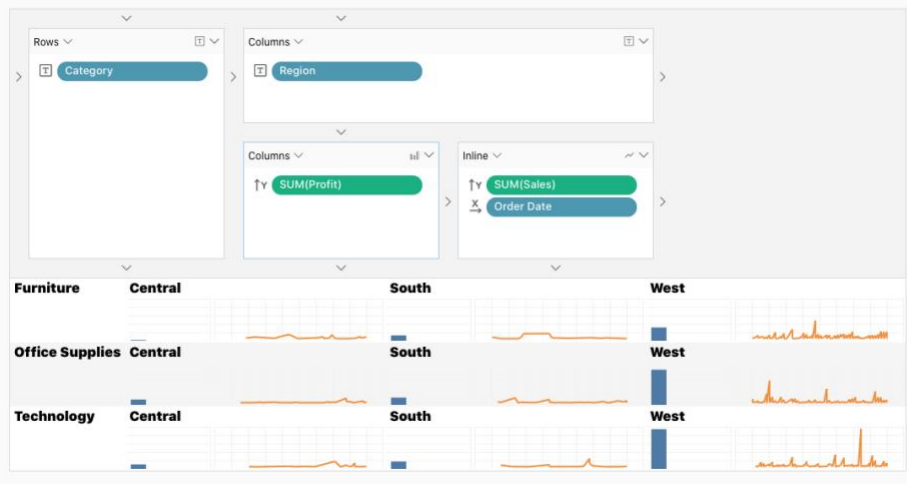

- Why isn't there a Rows/Column drop zone within an inline block and instead I have to drop it on Detail? This is confusing and I couldn't figure it out for a long time. I dropped Ship Mode on X-axis which I knew didn't make sense but it felt like my only choice. See below for the final correct result.

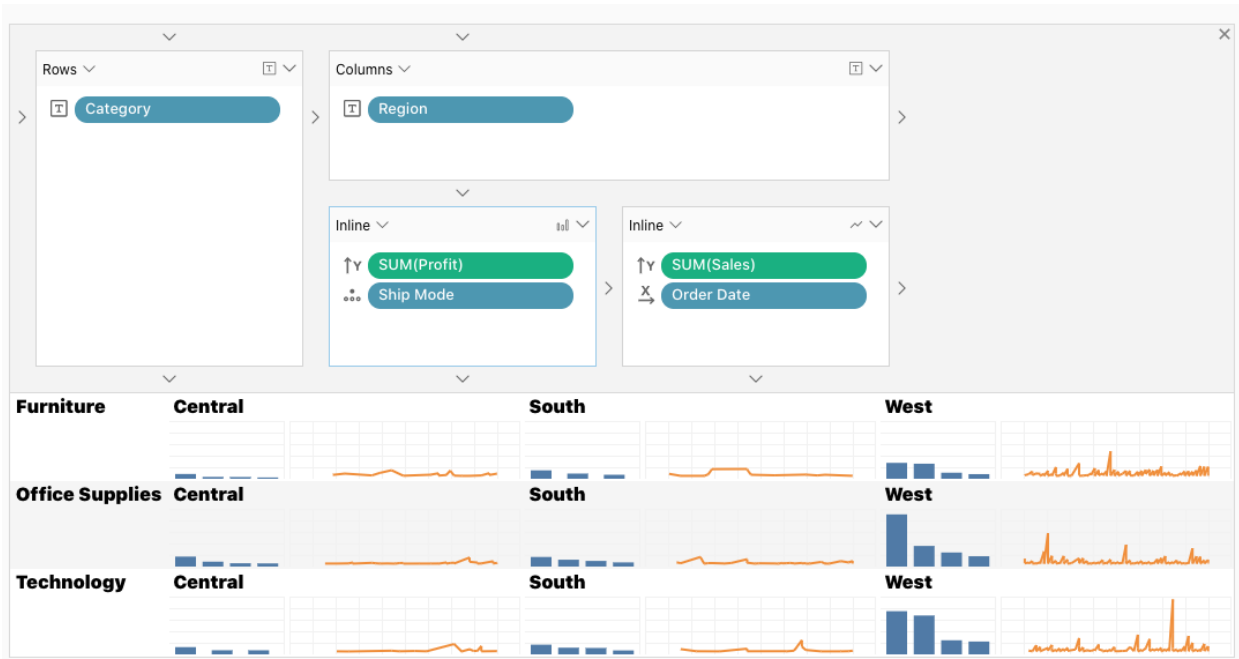

## Any final reflections?

- Overall blocks make it very very easy for me to create rich tables.

- It would be nice to be able to remove the shelves from the visible canvas and as such allow me to see how this would look if I shared it with consumers.
