# Supplementary material
Source: ML conference proceedings conference paper supplement (https://openreview.net/forum?id=eK2ZbaaJvd)
Supplement: supplementary_material [file attachment]

WHOA this live demo is wicked!!

12:40

1:13

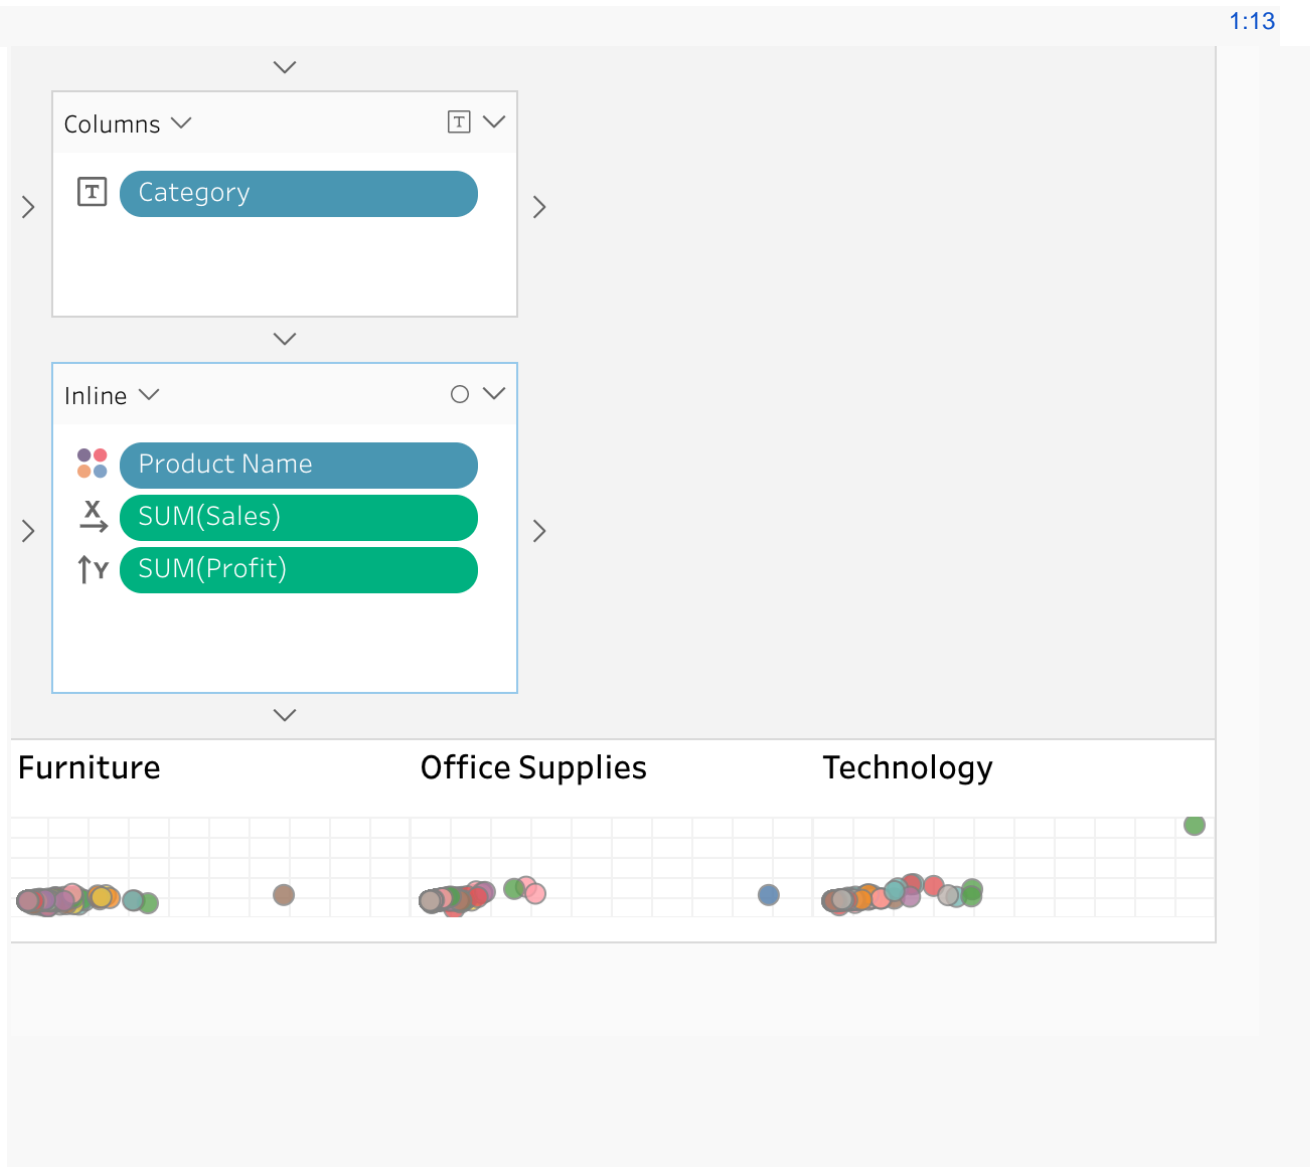

Rows ▼

T

▼

T

Region

Central

South

West



I think what's hard about the UX is the need to drag to shelves. If you could drag to the viz and it generates the shelf, that would be easier

The extra flexibility lets us do this with no table calcs or anything, just works

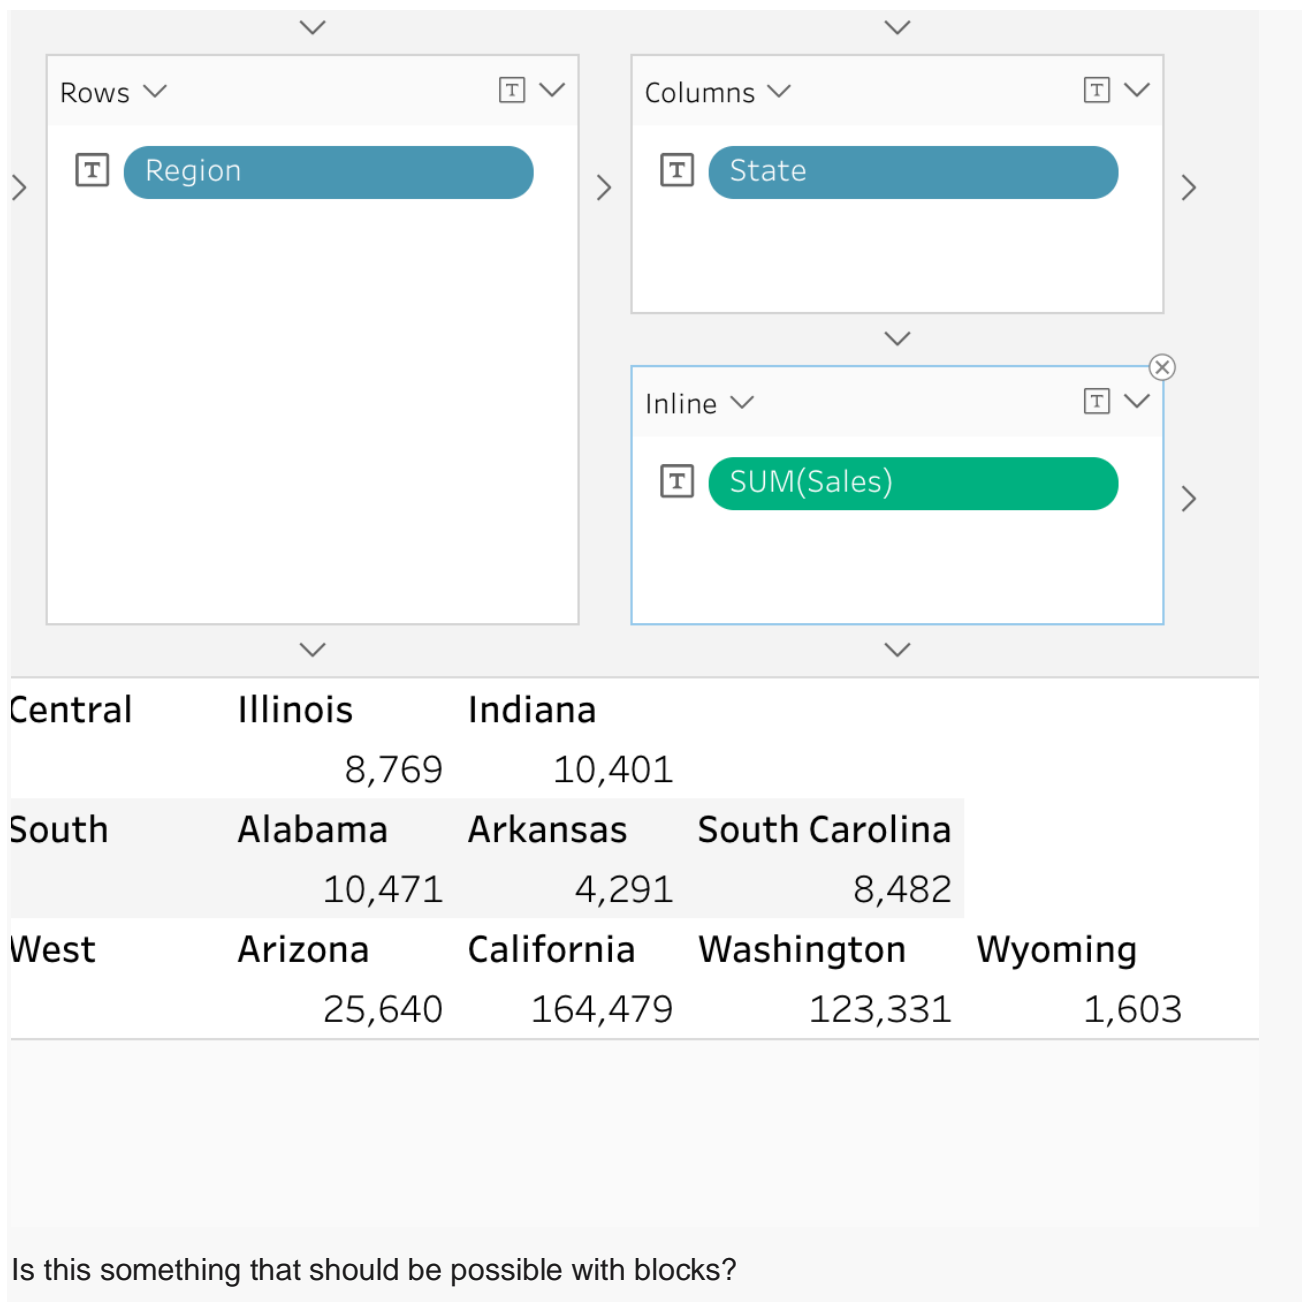

Is this something that should be possible with blocks?

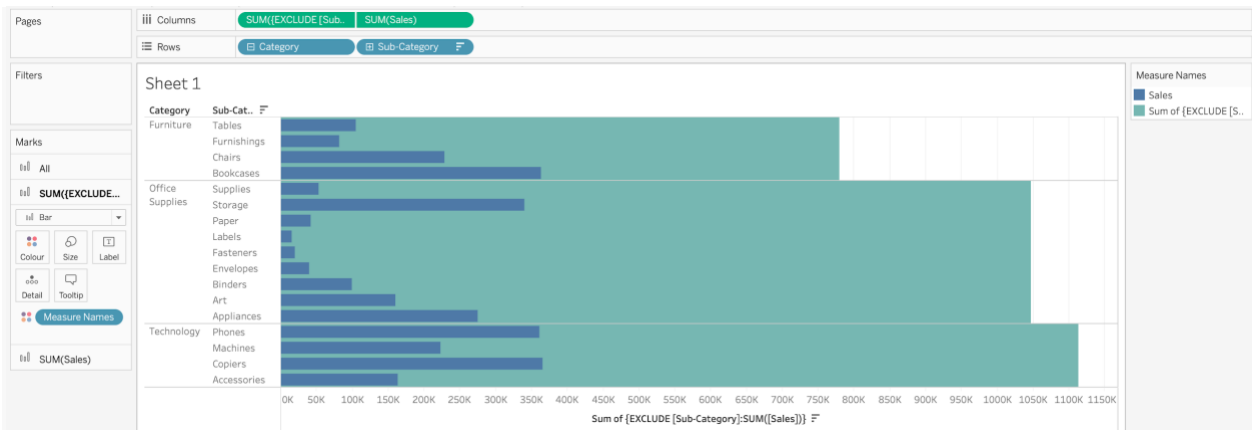

It's one of the first cases that jumped to mind based on shared fields across different LoDs

I did wonder if there should be one giant mark for the Sales measure at the category level of detail because it looks like those marks have a relationship to bookcases, appliances, and accessories

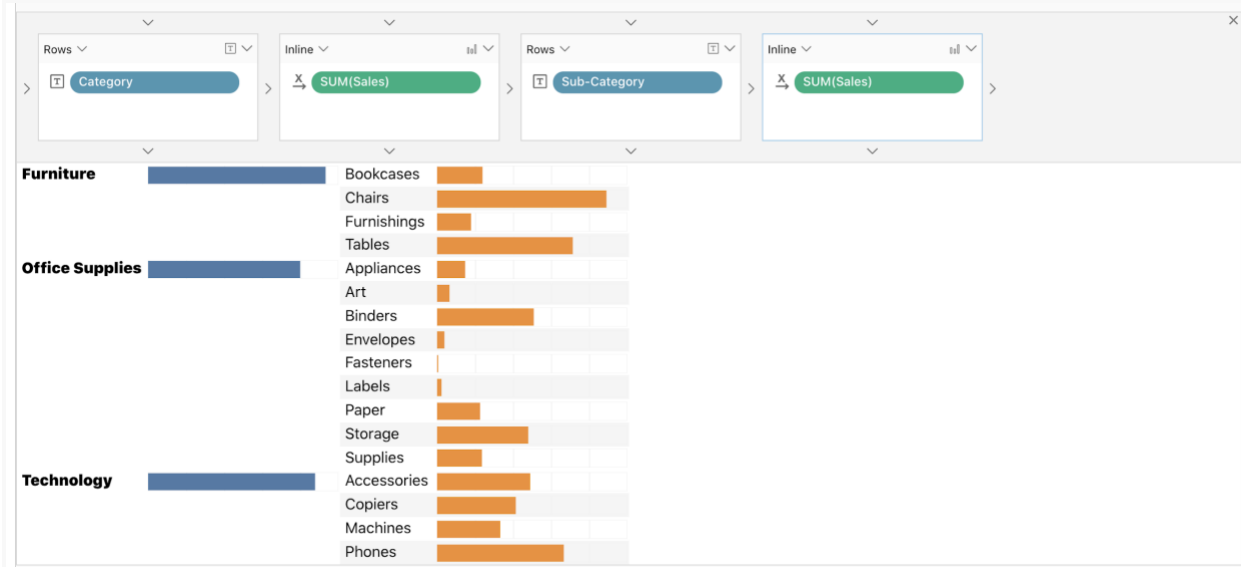

3 replies

In this viz, I would expect that profit and sales are in the same block, generating something like measure names/ measure values

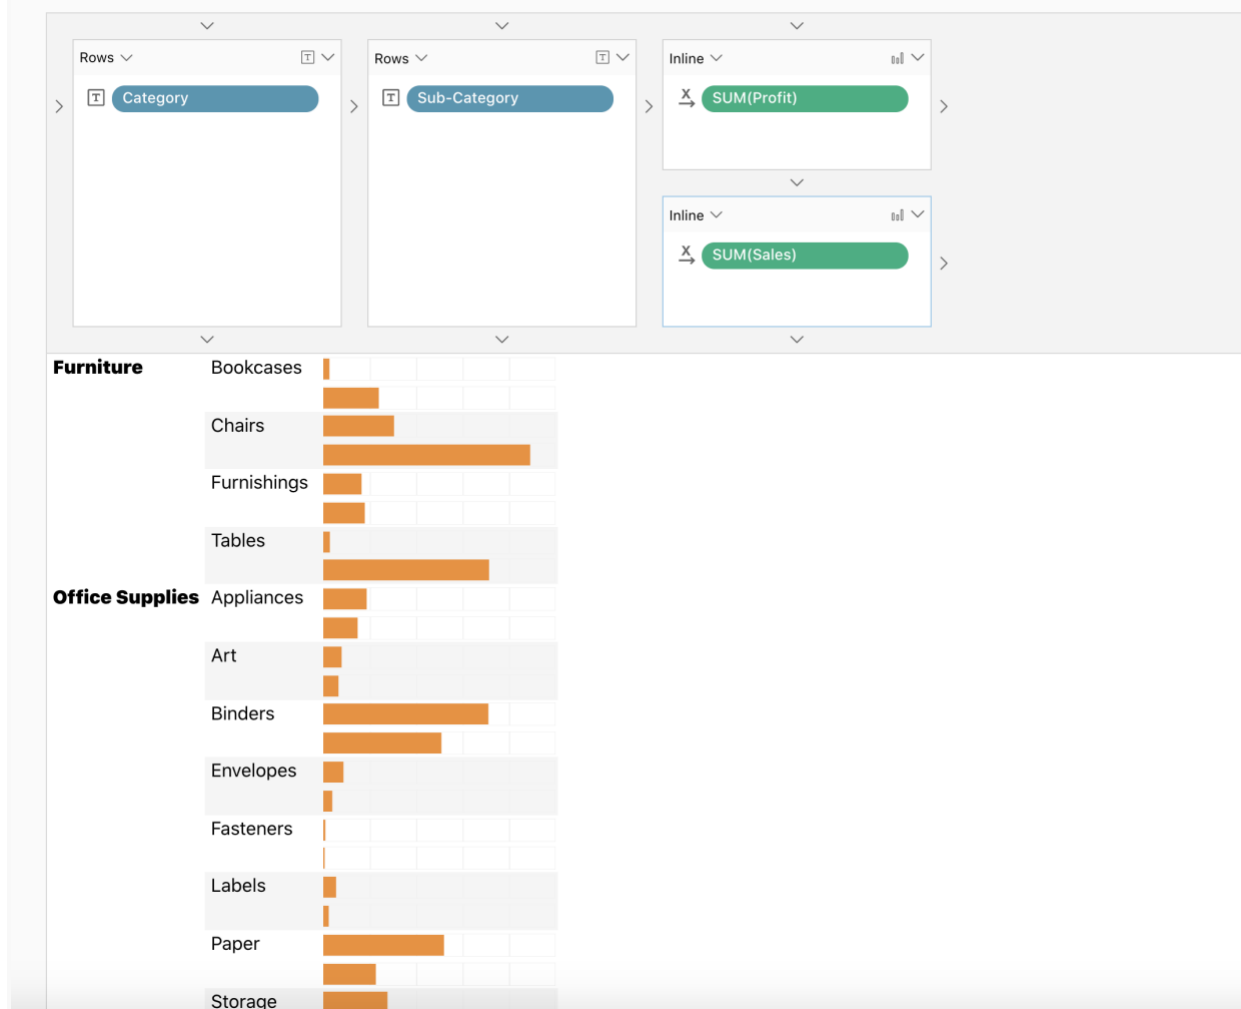

Revisiting this viz. Should the inline measures be treated as a single block, but with different mark type configurations? It strikes me as unwanted flexibility that each inline measure expands separately. I shouldn't have to force the mark type to be the same for both measures just to have product name appear for both measures
