# Supplementary material
Source: ML conference proceedings conference paper supplement (https://openreview.net/forum?id=eK2ZbaaJvd)

**TASK 3A (COVID-19 California dataset)**  
Create a table that shows the New Count Confirmed, Total Count Confirmed and Total Count Deaths for each county in California.

**Tableau**

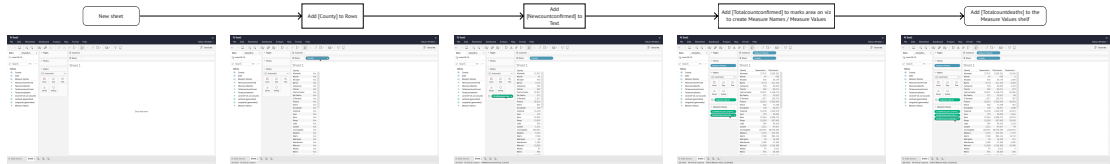

**Blocks**

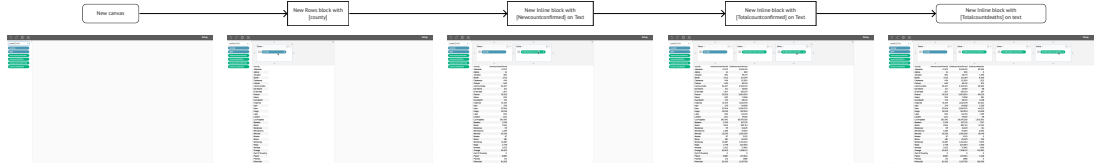

### TASK 3B (COVID-19 California dataset)

Given the table from the previous task, add a column with the time attribute Date to generate sparklines to show the total count deaths over time.

#### Tableau

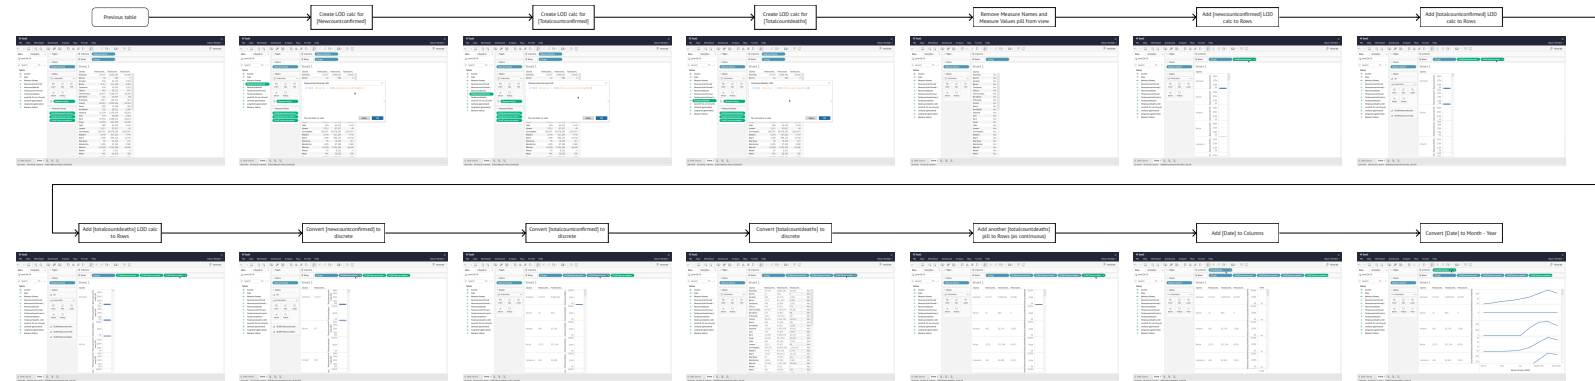

#### Blocks

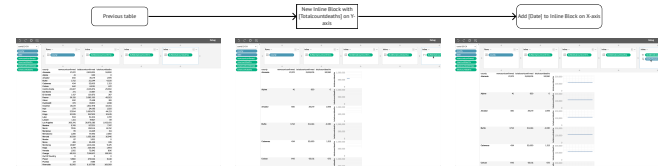

Supplement: supplementary_material [file attachment]
