# Supplementary material
Source: ML conference proceedings conference paper supplement (https://openreview.net/forum?id=eK2ZbaaJvd)

Started with a simple bar chart. Could turn it to horizontal bars. But how do I add a label to the end of the bar?

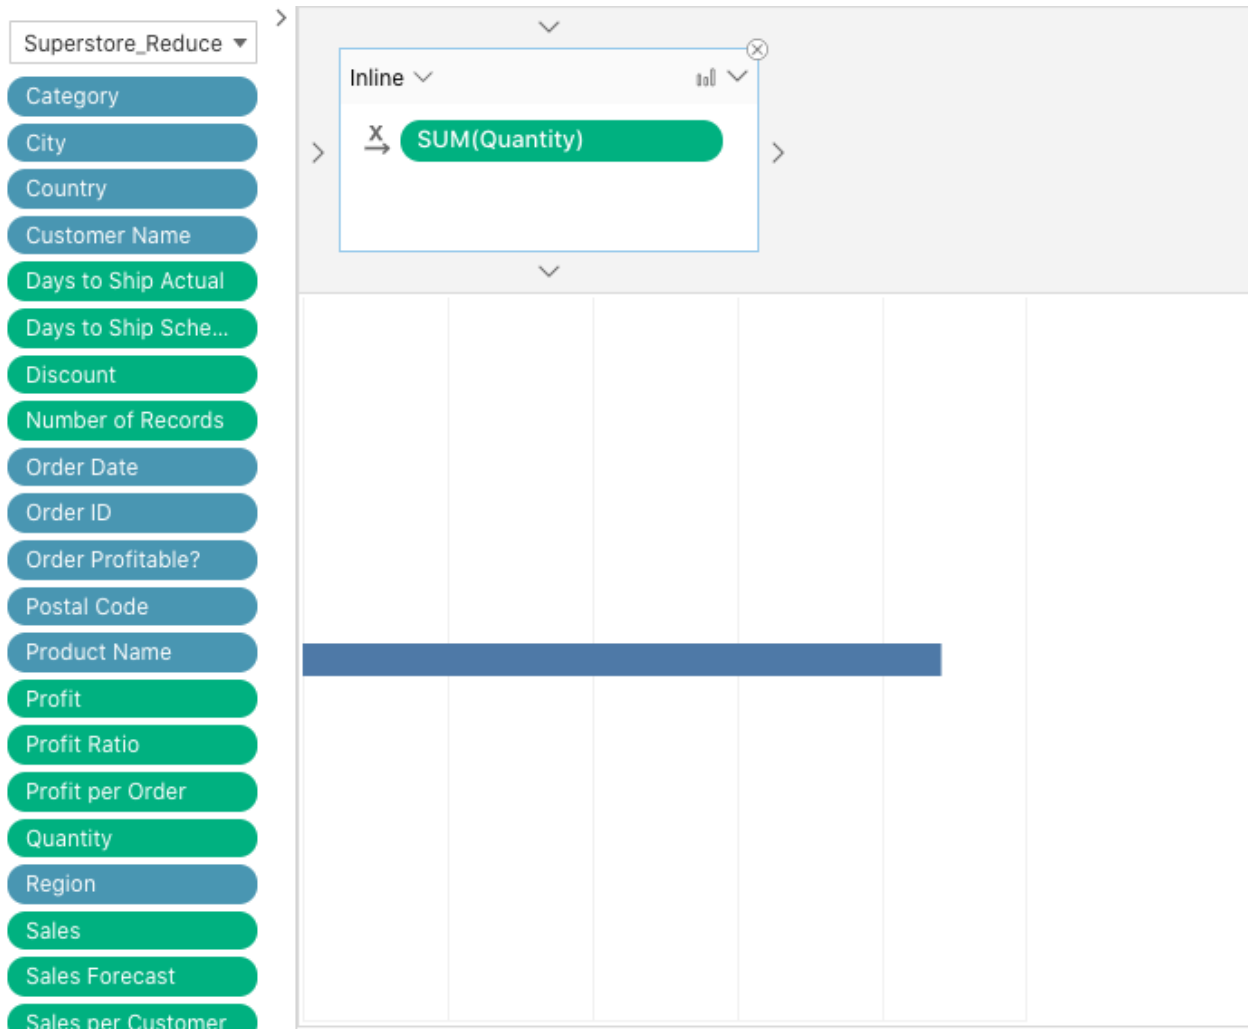

Changing to Text type shows a grayed-out bar. This makes me wonder if the bar represents real data or is just a placeholder?

The screenshot shows a data visualization tool interface. On the left is a list of fields from a dataset named 'Superstore\_Reduce'. The fields are: Category, City, Country, Customer Name, Days to Ship Actual, Days to Ship Sche..., Discount, Number of Records, Order Date, Order ID, Order Profitable?, Postal Code, Product Name, Profit, Profit Ratio, Profit per Order, Quantity, Region, Sales, Sales Forecast, Sales per Customer, Segment, Ship Date, Ship Mode, Ship Status, State, and Sub-Category. The fields are color-coded: blue for categorical/identifier fields and green for numerical/quantitative fields.

On the right is the visualization area. At the top, there is a tab labeled 'Inline' with a dropdown arrow. A red circle highlights a 'Text' icon (represented by a small 'T' in a square) next to a dropdown arrow. Below this, there is a green pill-shaped button containing the text 'SUM(Quantity)'. Below the visualization area, there is a grayed-out horizontal bar, which is the subject of the user's question.

Adding a text object shows a title and not a label... hmmm.

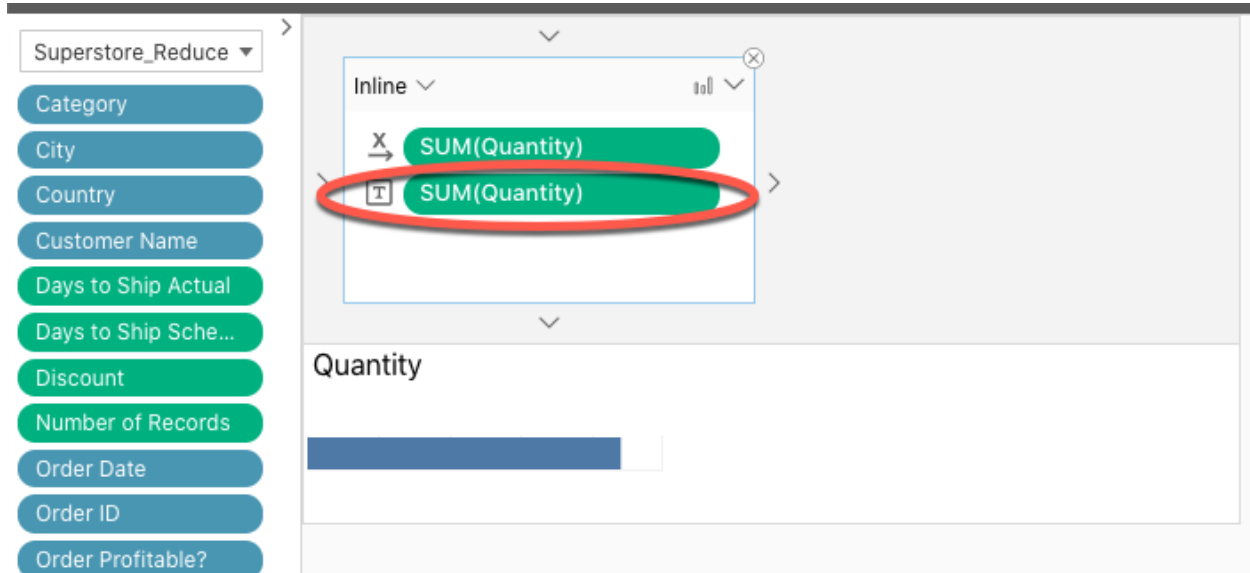

Changing to circle shows a mini chart with y-axis = 0. I expected just a circle but no y-axis at all.

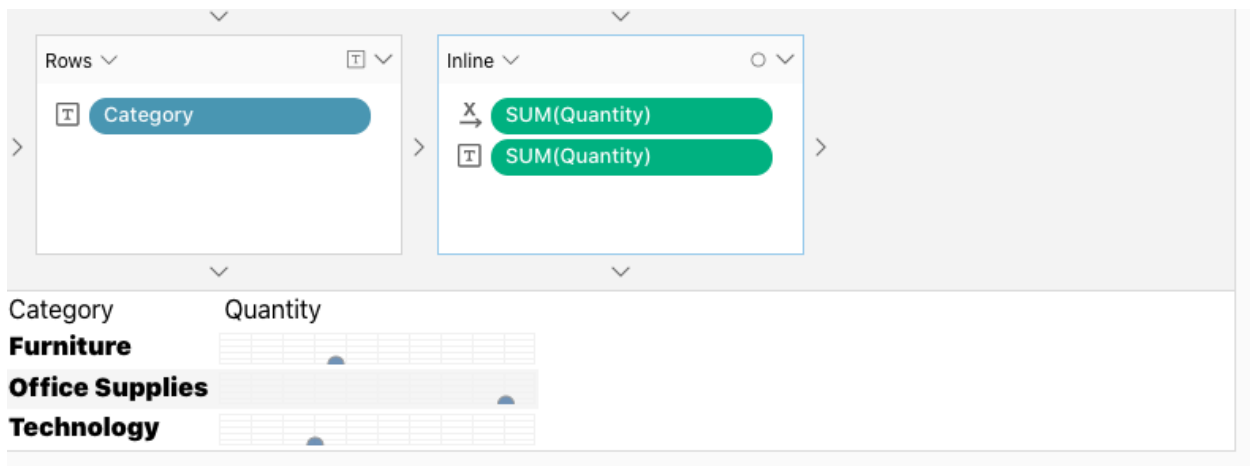

I put City on the X-axis for the left-most block.

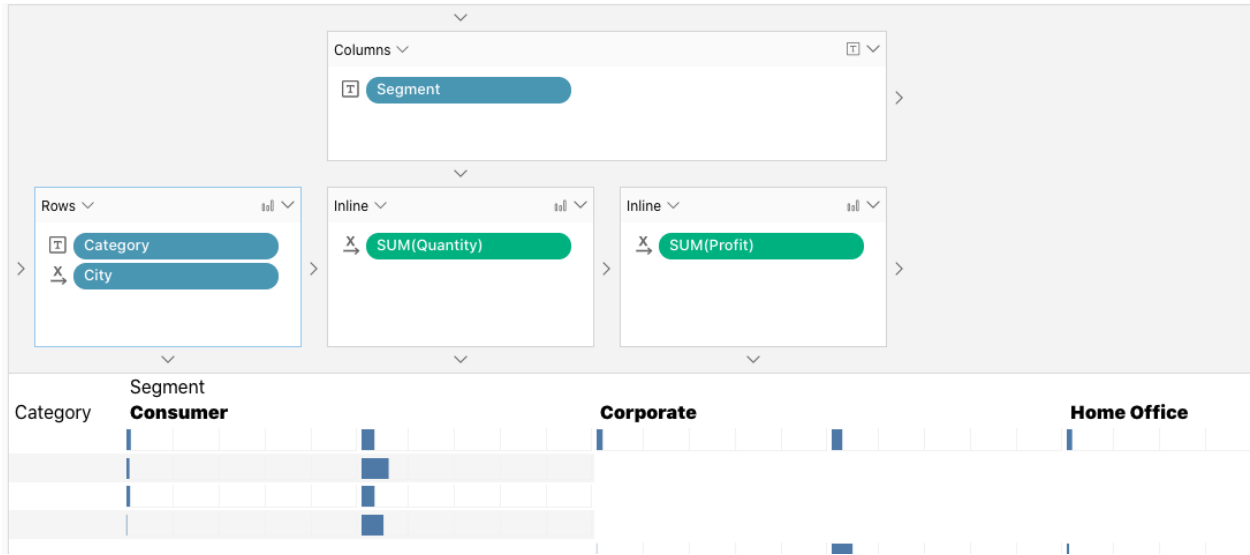

It looks like the days to ship actual standard class is highest for segment=consumer and category=office supplies.

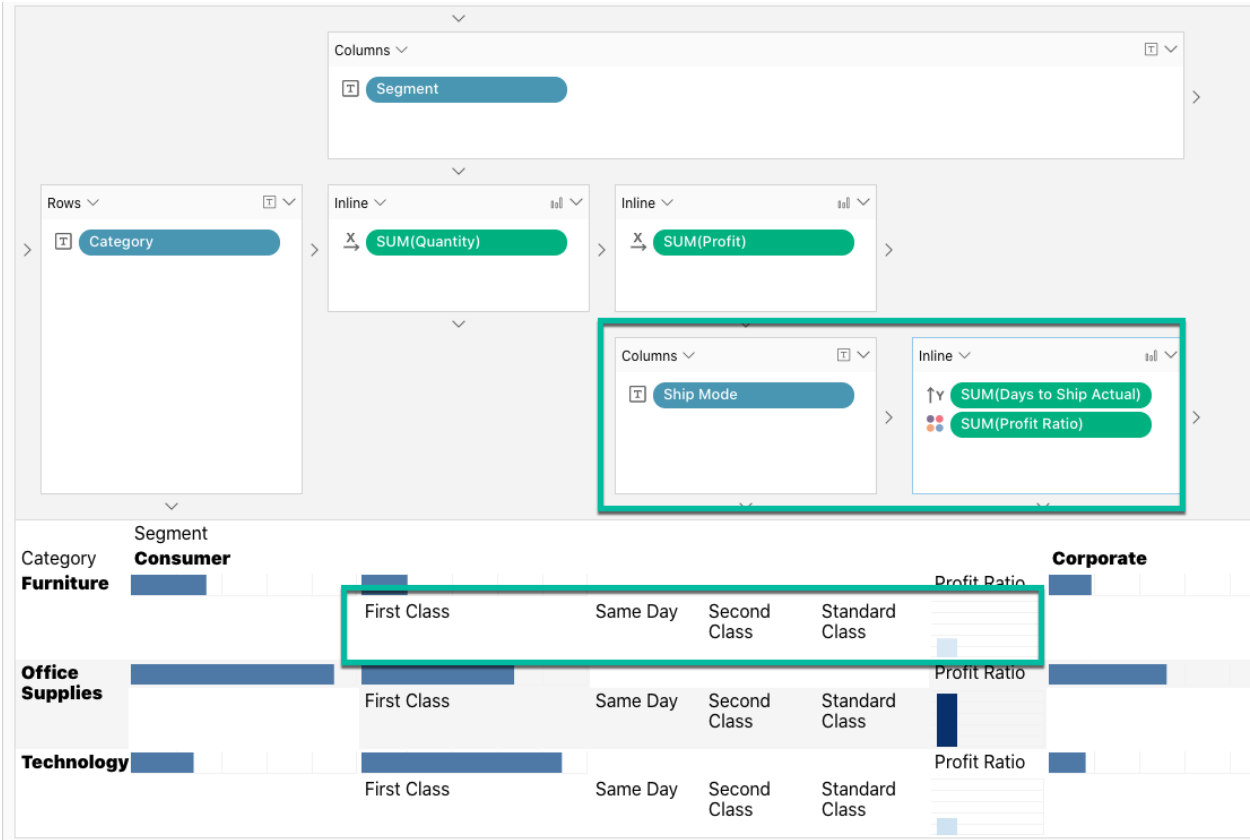

Supplement: supplementary_material [file attachment]
