# Supplementary material
Source: ML conference proceedings conference paper supplement (https://openreview.net/forum?id=eK2ZbaaJvd)

Create a crosstab that shows SUM(NumberSurvived) by Sex (on Rows) and FamilyAboard (on Columns)

```
graph LR; A[New sheet] --> B[Add [Sex] to Rows]; B --> C[Add [FamilyAboard] to Columns]; C --> D[Add [Number Survived] to Text];
```

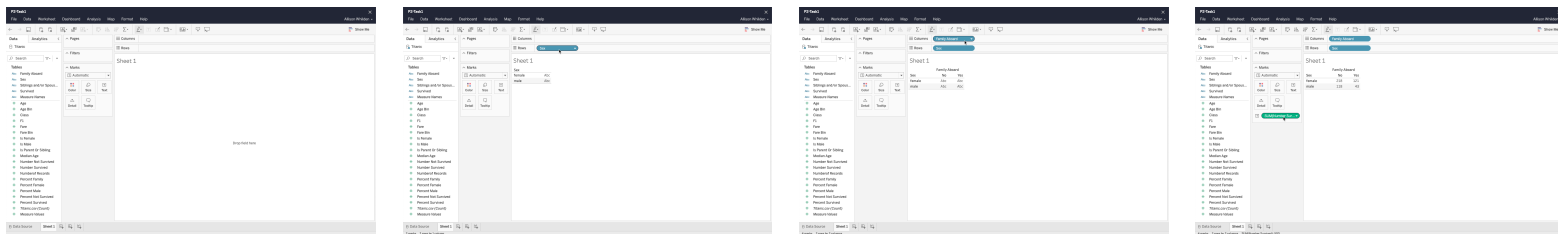

```

graph LR
    A[New canvas] --> B[New Rows block with  
[Sex]]
    B --> C[New Inline block with  
[Number Survived]]
    C --> D[New Columns block  
with [FamilyAboard]]
  
```

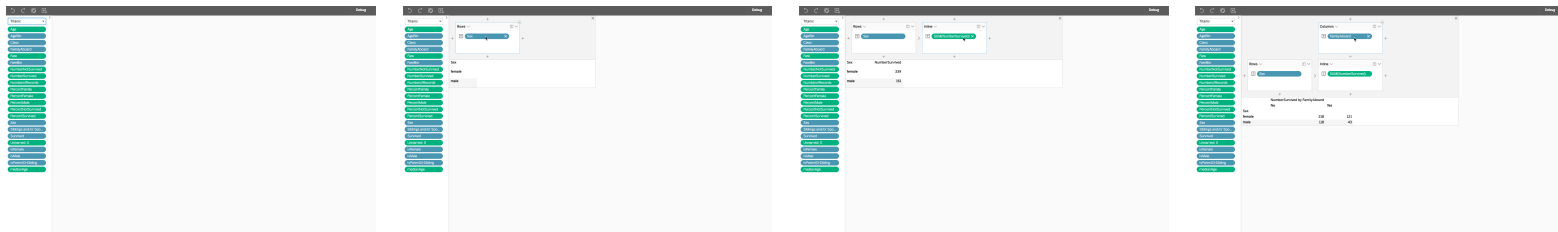

## TASK 1B (Titanic dataset)

Now switch to show bar charts for number of survived  
with Avg(Age) on color

### Tableau

Move [Number  
Survived] to Columns

Add [Age] to Color

Change aggregation for  
[Age] to AVG

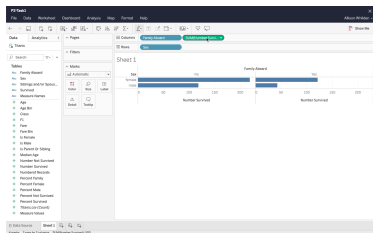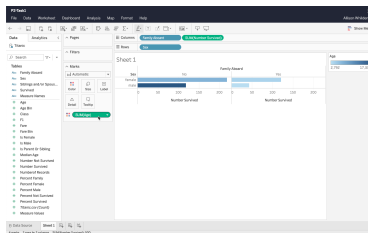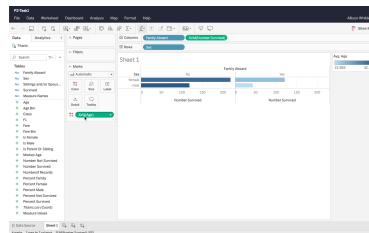

### Blocks

Change [Number  
Survived] to X-axis

Add [Age] to Inline Block

Change aggregation for  
[Age] to MEAN

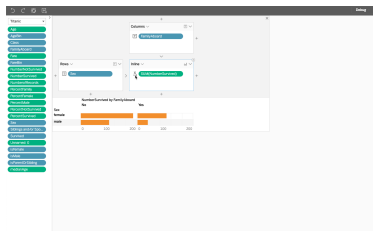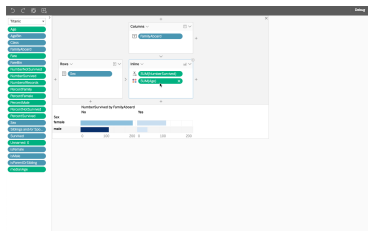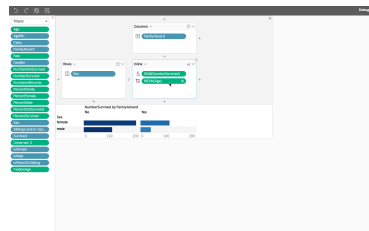

Supplement: supplementary_material [file attachment]
