# Supplementary material
Source: ML conference proceedings conference paper supplement (https://openreview.net/forum?id=eK2ZbaaJvd)
Supplement: supplementary_material [file README.docx]

## Blocks: Creating Rich Tables with Drag and Drop Interaction

## Study Supplemental Material

### **Table of Contents**

1. Experimenter script
2. Study tutorial video
3. Task flows
4. Diary studies
